1           **The functional organization of descending sensory-motor**  
2                                   **pathways in *Drosophila***

3  
4  
5           Shigehiro Namiki,<sup>1</sup> Michael H. Dickinson,<sup>2</sup> Allan M. Wong,<sup>1</sup> Wyatt Korff,<sup>1</sup> Gwyneth M.  
6                                   Card,<sup>1,\*</sup>

7  
8                           <sup>1</sup>*Janelia Research Campus, Howard Hughes Medical Institute, Ashburn, VA 20147, USA*

9                           <sup>2</sup>*Division of Biology and Bioengineering, California Institute of Technology, Pasadena, CA 91125, USA*

10  
11  
12           This manuscript includes 55 pages of typescript, 15 figures, 0 tables, 24 supplemental figures, and 6  
13           supplementary tables.

14  
15           KEYWORDS: command neuron; descending neuron; motor control; neuron database; ventral  
16           nervous system

17  
18           \*Correspondence should be addressed to [cardg@janelia.hhmi.org](mailto:cardg@janelia.hhmi.org) (G.M.C)

20 **SUMMARY**

21

22 In most animals, the brain controls the body via a set of descending neurons (DNs) that traverse the neck  
23 and terminate in post-cranial regions of the nervous system. This critical neural population is thought to  
24 activate, maintain and modulate locomotion and other behaviors. Although individual members of this  
25 cell class have been well-studied across species ranging from insects to primates, little is known about the  
26 overall connectivity pattern of DNAs as a population. We undertook a systematic anatomical investigation  
27 of descending neurons in the fruit fly, *Drosophila melanogaster*, and created a collection of over 100  
28 transgenic lines targeting individual cell types. Our methods allowed us to describe the morphology of  
29 roughly half of an estimated 400 DNAs and create a comprehensive map of connectivity between the  
30 sensory neuropils in the brain and the motor neuropils in the ventral nerve cord. Like the vertebrate spinal  
31 cord, our results show that the fly nerve cord is a highly organized, layered system of neuropils, an  
32 organization that reflects the fact that insects are capable of two largely independent means of locomotion  
33 – walking and flight – using distinct sets of appendages. Our results reveal the basic functional map of  
34 descending pathways in flies and provide tools for systematic interrogation of sensory-motor circuits.

35

## 36 INTRODUCTION

37

38 The evolution of nervous systems is dominated by the process of cephalization, in which anterior ganglia  
39 fuse to create a brain that integrates information from a number of specialized sensory organs (Bullock  
40 and Horridge, 1965). In most animals, this large cephalic structure communicates with motor centers via a  
41 diverse population of descending neurons (DNs), with axons that run in connectives, or tracts, to more  
42 posterior ganglia. As the sole conduits of information from the brain to the posterior ganglia within the  
43 nerve cord, the DNs play a key role in behavior. Their activity initiates or modifies central pattern  
44 generators in the nerve cord, thereby controlling locomotion without necessarily conveying the details of  
45 motor actions (Lemon, 2008; Heinrich, 2002). Activation of some individual DNs is sufficient to elicit  
46 quite specific coordinated actions (Kien & Altman, 1984; Nolen & Hoy, 1984; Kohatsu et al., 2011; von  
47 Philipsborn et al., 2011; Bidaye et al., 2014; von Reyn et al., 2014).

48

49 Because the number of DNs is several orders of magnitude smaller than the number of neurons in either  
50 the brain or posterior ganglia, this class of cells represents a critical bottleneck in the flow of information  
51 from sensory systems to motor circuits. The DNs are thus a strategic target for investigating sensory-  
52 motor processing, and a wiring diagram of their connectivity is critical to understanding how the nervous  
53 system controls behavior (Burrows, 1996; Drew, 2004). Although previous studies have revealed the  
54 broad organization of descending pathways in a range of species (Breidbach, 1990; Kanzaki et al., 1994;  
55 Staudacher, 1998; Okada et al., 2003; Cardona et al., 2009; Hsu and Bhandawat, 2016; Severina et al.,  
56 2016; Altman et al., 1984; Strausfeld et al., 1984; Strausfeld, 2012; Lemon, 2008), uncovering the  
57 sensory-motor mapping represented by the DNs requires analysis of inputs and outputs with single-cell  
58 resolution. The genetic model organism, *Drosophila melanogaster*, offers an opportunity to pursue such  
59 a systematic analysis. Flies are capable of complex behaviors, yet possess a tractable number of DNs,  
60 most of which can be individually identified across animals. Estimates for the total number of DNs in  
61 insects range from 200 to 500 bilateral pairs (Gronenberg & Strausfeld, 1990; Okada et al., 2003;  
62 Staudacher, 1998; Gal & Libersat, 2006; Cardona et al. 2009), with a recent study suggesting *Drosophila*  
63 may be at the top of this range (Hsu & Bhandawat, 2016). Yet even this largest estimate is substantially  
64 less than the approximately 100,000 cells that descend from the brain to the spinal cord in mice (Liang et  
65 al., 2011).

66

67 Recent combinatorial genetic techniques make it possible to target individual neurons in the fly nervous  
68 system for visualization and manipulation (Aso et al., 2014; Wolff et al., 2015; Wu et al., 2016). Here,

69 we applied these techniques to identify individual DNs in *Drosophila* and create a large collection of  
70 selective driver lines that will facilitate their future study. This collection enabled us to systematically  
71 map the coarse input and output patterns of the DN population. Our results suggest that DNs in  
72 *Drosophila* and other insects are organized into three broad pathways. Two direct pathways link specific  
73 regions in the brain to motor centers controlling the wings and legs, respectively. A third, convergent  
74 pathway couples a broad array of brain neuropils to a large integrative region between wing and leg  
75 neuropil that may control both sets of appendages. This organization thus likely reflects both the function  
76 of each pathway's member cells and the evolutionary history of winged insects.

77

78

## 79 **RESULTS**

80

### 81 **Identification of individual DNs**

82 Several thousand neurons run through the cervical connective of flies (Coggshall et al., 1973), including  
83 both descending neurons (DNs) and ascending neurons (ANs). To estimate the number of DNs, we  
84 expressed photoactivatable-GFP (PA-GFP; Patterson & Lippincott-Schwartz, 2002) under a pan-neuronal  
85 promoter (*nsyb-LexA*, Jennett et al., 2012, Suver et al., 2016), labeled the neurons by illuminating the  
86 neck connective (Figure 1A, B), and then counted cell bodies in the brain. For convenience, we  
87 operationally define a DN as a cell with a process in the neck connective and a soma in the brain, without  
88 any assumption regarding the direction of information flow. We observed a similar pattern of labeling in  
89 4 animals and estimated the total number of DNs at ~350 on each side of the brain (~700 total) based on  
90 the maximum cell body count among preparations (max = 356 cells, mean  $\pm$  S.D. =  $321 \pm 23$  cells,  $N = 4$ ;  
91 Figure 1C, D).

92

93 Our next goal was to characterize systematically the morphology of each DN and create a library of split-  
94 GAL4 lines that targeted individual cell types. We discerned the morphology of individual DNs using a  
95 large, publically available database of GAL4-driven expression patterns that covers nearly all neurons in  
96 the fly central nervous system (Pfeiffer et al., 2008; Jenett et al., 2012; Costa et al., 2016). We then  
97 crossed GAL4-lines of interest ( $N = 586$  lines, see Methods) to *teashirt-GAL80* (Rubinstein et al., 2010),  
98 an operation that substantially reduced expression of cells with a soma in the VNC, revealing DN axon  
99 terminals in the VNC (Figure 1E). Based on these results, we selected pairs of driver lines that appeared  
100 to target the same DN cell type and made these into 'split half' lines, using the relevant promoters to drive  
101 expression of either the activation domain (AD) or the DNA binding domain (DBD) of the split-GAL4

102 protein (Luan et al., 2006). We then screened over two thousand AD/DBD combinations for expression  
103 restricted to single DN cell types. About 10% of the combinations produced an expression pattern sparse  
104 enough to include in our collection (Figure 1F). In some cases, an AD/DBD split-GAL4 combination  
105 drove expression in more than one DN and we used the multi-color flip out technique (Nern et al., 2015)  
106 to stochastically label individual neurons. We identified a total of 190 bilateral pairs of DNs (out of our  
107 original estimate of 350), representing at least 98 cell types (Figure 2, Figure 2 —figure supplement 1-4,  
108 Supplementary Table 1). Estimated cell types are fewer in number than total cells identified because some  
109 DN types comprise more than one bilateral pair (see below). We note the morphological similarity of  
110 DNs we found to neurons previously reported in *Drosophila* and other insects in Supplementary Table 2.  
111

112 Our original split-GAL4 library included ~200 lines, and we selected a subset of these to create a final  
113 library of 133 of the sparsest split-GAL4 lines targeting 54 of the 98 identified DN types with little-to-no  
114 background expression (Supplementary Table 3). As a potential genetic control to be used in future  
115 functional studies, we include in this list one line, SS01062, which was made with the same process as the  
116 other split-GAL4 lines, but had no expression in the CNS. While making DN split-GAL4 lines, we also  
117 serendipitously created lines with sparse expression in VNC inter- and motor neurons, and we list 10 of  
118 these in Supplementary Table 4. These lines (Supplementary Tables 3 and 4) form the basis of our  
119 analysis in this paper. Though we did not analyze them in detail, we include a listing of the more broadly  
120 expressing DN split-GAL4 lines in Supplementary Table 5.  
121

122 DN cell bodies are distributed widely across the brain surface (Figure 1C-D). We found 21 DNs (19  
123 types) with somata on the anterior surface, 46 DNs (37 types) on the posterior surface, and 121 DNs (41  
124 types) on the surface of the GNG (Figure 1C, D). Based on somata counts from the PA-GFP  
125 experiments, the 190 DNs we describe represent 67% (121/180) of all GNG DNs, 51% (22/41) of anterior  
126 DNs, and 35% (46/131) of posterior DNs. The cell body of one neuron is located inside the antenna, and  
127 is likely the homolog of a previously described campaniform sensory neuron in blowflies (Nässel et al.,  
128 1984). Because each DN soma is reliably restricted to a single region (a likely reflection of its original  
129 neuroblast lineage), we developed a simple nomenclature for the DNs in which a prefix identifies it as a  
130 descending neuron with a particular cell body position: DNa, anterior dorsal; DNb, anterior ventral; DNC,  
131 pars intercerebralis; DNd, outside cell cluster on the anterior surface; DNg, gnathal ganglion (GNG),  
132 DNp, posterior surface of the brain; DNx, outside the brain (see Figure 2, Figure 2 —figure supplement 1-  
133 4). Within each prefix designation, cell types are identified by a unique two-digit number. Such a soma-  
134 based nomenclature has been adopted elsewhere (Yu et al., 2010) and should be more straightforward  
135 than one based on the broad locations of either dendrites or terminals, which would be quite byzantine.

136

137 Based on morphology, we identified two broad classes of DNs: unique DNs (78 bilateral cell types;  
138 Figure 3A) that we could tentatively identify as unique bilateral pairs, and population DNs (20 types  
139 encompassing 112 cells; Figure 3B) that form small groups of cells with nearly identical arbors (Figure 3  
140 —figure supplement 1). The GAL4 and split-GAL4 lines that targeted the population DNs usually labeled  
141 multiple neurons with very similar morphology. We estimated the number of cells within each  
142 population type by taking the largest number labeled in a single driver line. In general, population DNs  
143 had smaller cell bodies and neurite diameters compared to the unique DNs, and many had soma in the  
144 GNG. Populations of DNs with similar morphology and cell bodies in the suboesophageal ganglion were  
145 previously observed in the blowfly (‘Parallel projecting DNs’, Strausfeld et al., 1984). However, we  
146 cannot exclude the possibility that the DNs we have designated as ‘populations’ are actually composed of  
147 unique bilateral pairs whose morphological similarities mask their individual genetic and functional  
148 identity. It is also possible that some of the DNs that we have labeled as ‘unique’ exist as populations, but  
149 we have not yet identified other members of the set. Thus, our classifications should be re-considered in  
150 the light of future studies.

151

## 152 **Annotation of individual DN innervation in the brain and VNC**

153 To analyze the coarse connectivity between the brain and VNC, we examined DN projections within  
154 neuropils of the central nervous system. To annotate the innervation pattern for each DN (Figure 4A-D),  
155 we used the recent nomenclature scheme proposed for 41 neuropil regions of the fly brain (Ito et al.,  
156 2014). The complimentary analysis of DN innervation in the VNC was more challenging, because we  
157 lacked a similar standardized atlas for the VNC. Power (1948) provided a description of VNC neuropils  
158 in *Drosophila melanogaster*, however, these regions have not been defined based on modern molecular  
159 markers. Lacking a formal atlas, we defined VNC neuropil region boundaries based on the following  
160 criteria (see also Court et al., 2017): 1) synaptic areas delineated by NC82 antibody staining, 2) the  
161 location of motor neuron dendrites, sensory fiber terminals and tracts, and 3) descriptive information from  
162 the literature. These compartmental boundaries were then further refined based on the projection pattern  
163 of the DNs as discussed below. In all, we defined 16 VNC neuropils with boundaries as illustrated in  
164 Figure 4E-F.

165

166 Our analysis of the VNC suggests that the tectulum, a neuropil near the dorsal surface associated with  
167 flight and other wing-related behaviors (Power, 1948; Murphey et al., 1989; Shepherd et al., 2016),  
168 stratifies into a dorsal layer that we propose retain the name ‘tectulum’ (Figure 4G, green) and a more  
169 ventral layer we call the ‘lower tectulum’ (Figure 4G, red). This lower region encompasses an area

170 defined by the projections of bristle afferents from macrochaetes on the notum (Usui-Ishihara & Simpson,  
171 2005). It is also likely homologous with the bristle neuropil in crickets (Johnson & Murphey, 1985) and  
172 the anterior ventral association center in locusts (Tyrer & Gregory, 1982). As shown below, the  
173 segregation of DN terminals in the VNC (e.g. DNp01, p04, p29, p35, g29 and g40) supports the  
174 classification of tectulum and lower tectulum as separate functional regions. The arborizations of motor  
175 neurons and interneurons within the VNC we identified during the course of DN screening  
176 (Supplementary Table 4) also supports this stratification. For example, the neurites of wing motor  
177 neurons and interneurons rarely project below the ventral boundary of the tectulum (Figure 4-Supplement  
178 1), whereas we identified new interneurons with arbors that specifically targeted the lower tectulum  
179 (Figure 4 —Figure supplement 2).

180

181 Our analysis thus far was based on the standard 20x confocal imaging of expression patterns for DN-  
182 containing GAL4 and split-GAL4 lines. We re-imaged a subset of these lines with higher magnification  
183 (40x, 63x) to resolve finer details. At higher spatial resolution, we observed that DN neurites were either  
184 smooth or varicose in appearance, suggesting post-synaptic dendrites and pre-synaptic axonal terminals,  
185 respectively (Peters et al., 1986; Römer & Marquart, 1984). To provide more rigorous molecular evidence  
186 for this classification, we examined DN polarity using a reporter (pJFRC51-3xUAS-Syt::smGFP-HA in  
187 su(Hw)attPa) that localizes to presynaptic terminals by labeling of synaptotagmin, a synaptic vesicle-  
188 specific protein (Figure 5A-E). We analyzed 55 DN types in this fashion and found all varicose terminals  
189 were positive for synaptotagmin and all smooth processes were not, at least at the level of the light  
190 microscope. This functional interpretation of neurite morphology was also recently validated in  
191 *Drosophila* larvae using electron microscopy data (Cardona et al., 2010). We thus classified the  
192 processes of the remaining 43 DN types as either pre- or post-synaptic, based on morphology alone  
193 (Figure 5F).

194

195 In general, DN arbors in the brain have smooth processes, whereas those in the VNC are varicose (Figure  
196 5F), a pattern consistent with a rostral-to-caudal flow of information. However, some DN types possess arbors  
197 with varicosities in the brain, indicating that they contact post-synaptic targets before descending to the  
198 VNC. It is noteworthy that 78% of the DN types (76/98) have output terminals in the GNG (Figure 5F;  
199 examples, Figure 5 —figure supplement 1), whereas 29% have inputs in this region (Figure 5F). Although  
200 the GNG is fused to the brain in *Drosophila*, comparative and developmental evidence indicates that it is  
201 the first member of the chain of segmental ganglia, and thus it is not surprising that so many DN types target  
202 circuits in this region.

203

204 We observed 43 DN types that have presynaptic terminals (outputs) in the neuropils of the cerebral  
205 ganglia (i.e. the brain excluding the GNG) (Figure 5F). Six of these (DNp29, p32, g30, p27, c01, and  
206 c02) possess extremely large arbors with both inputs and outputs distributed across the cerebral ganglia  
207 (Figure 5—figure supplements 2 and 3). The remaining 37 DN types have much more specific targets in  
208 the cerebral ganglia (Figure 5—figure supplement 4). For example, the varicose processes of DNp04 are  
209 mostly contained within a single optic glomerulus (Strausfeld et al., 2007) (Figure 5—figure supplement  
210 4A-B). In 7/37 of the DN types with targeted brain outputs (DNa05, p02, g29, b01, b06, p09) the  
211 branches with output synapses appear to be small extensions of those innervating the GNG (Figure 5—  
212 figure supplement 4C).

213

### 214 **DN distribution throughout the CNS**

215 Based on our assignment of inputs and outputs (Figure 5F), we compiled the number of DN types with  
216 processes in each brain and VNC neuropil (Figure 6). DNs extend neurites into nearly every neuropil of  
217 the brain; although, the connectivity is far from uniform. By far, the region innervated by the largest  
218 number of DNs is the GNG. As discussed above, DN arbors in the GNG are largely presynaptic,  
219 representing a significant output area for descending information (Figure 6A, bottom plot). Restricting  
220 the analysis to putative inputs, the largest number of DNs receive input in the inferior posterior slope  
221 (IPS) (Figure 6A, top plot). Thirteen brain neuropils contained no DN process from the 190 DN cells we  
222 identified. Between these two extremes, we found DN neurites in 28 defined neuropil regions, exhibiting  
223 a roughly exponential distribution (Figure 6A). We did not observe DN dendrites in the central complex  
224 or mushroom bodies, suggesting no direct descending output from these high-order, integrative regions.  
225

226 Most (64%) of the DNs descend within the neck connective ipsilateral to their cell body (121 DNs, 54  
227 types vs. 69 DNs, 44 types, contralateral). Most brain neuropils and tracts contain both ipsi- and  
228 contralateral DNs (Figure 6—figure supplement 1A-C). The neuropil with the largest asymmetry in the  
229 number of ipsilateral and contralateral DNs is the inferior posterior slope (IPS), where a large majority of  
230 DNs project ipsilaterally. Once in the VNC, the DNs run through 8 different tracts, 7 of which are readily  
231 identifiable with NC82 staining (Figure 6B). We counted the largest number of the identified DN axons  
232 in the median and intermediate tracts of the dorsal cervical fasciculus (MTD, ITD). Within the VNC, the  
233 majority of DNs terminate in the third thoracic segment (61 types, 120 DNs), and only a fraction of DNs  
234 extend to the abdominal ganglia (14 types, 16 DNs; Figure 6C, Figure 6—figure supplement 1D).

235 Overall, the average DN receives input from  $2.7 \pm 2.0$  neuropil regions in the brain and outputs to  $1.9 \pm$   
236  $3.6$  neuropil regions in the VNC (Figure 6D-F).



237

## 238 **Organization of DN outputs**

239 We applied hierarchical clustering to the data in Figure 5F to determine the degree to which DN types  
240 segregate according to their projection pattern in the VNC (Figure 7A). The same data are transformed in  
241 Figure 7B to visualize the correlations among neuropil regions that emerge from this clustering analysis.  
242 With the exception of four DNs that send terminals to nearly every neuropil of the VNC (DNc01, c02,  
243 d02 and d03; Figure 5—figure supplement 3; Figure 7—figure supplement 1), we found a high degree of  
244 specificity in which neuropils were targeted by individual DN types (Figure 7B). The analysis supports  
245 the existence of two strong clusters, one consisting of cells targeting the three segmental pairs of leg  
246 neuromeres, and the other targeting the three dorsal neuropils associated with the neck, wing, and  
247 halteres, residing in the first, second, and third thoracic segments, respectively. Only a few (<10%) of the  
248 DNs that project to the dorsal neuropils (Figure 7A, blue), also have terminals in the ventral neuropils  
249 (Figure 7A, yellow), and vice versa. In fact, DNs with axonal projections to both wing and leg neuropil  
250 were quite rare, representing only 6% of the 98 cells types described in our analysis. These include three  
251 of the broadly projecting cells described above and three neurons with sparser projections (DNp18, b01,  
252 and g17, see Figure 7—figure supplement 2). This obvious separation between DNs with axon terminals  
253 in the dorsal and ventral VNC neuropil layers suggests independent descending control of wing and leg  
254 motor circuits.

255

256 Outside of the ~2/3 of DN types that target wing or leg neuropil, most of the remaining third (32/98)  
257 selectively targeted one or both of the intermediate neuropil layers, the tectulum and lower tectulum  
258 (Figure 7A). Six of these DNs targeted the abdominal segment as well (DNp29, p13, d01, g33, p27, and  
259 g30). We found only two DNs that terminated exclusively in the smaller association centers: DNg20,  
260 which targets the AMN and VAC (Figure 7—figure supplement 3), and DNg23, which targets mVAC.  
261 These three small neuropils receive input from sensory afferents (Power, 1948; Boerner et al., 2010). We  
262 also found one very unique neuron, DNg28, that did not innervate any VNC neuropil but instead sent  
263 branching processes along its surface (Figure 7—figure supplement 4).

264

265 As noted above, many DNs have presynaptic terminals in the brain, most commonly in the GNG.  
266 Although to date no cohesive sub-compartmental organization within the GNG has been formalized (Ito  
267 et al, 2014), the high density of projections there allowed us to test whether this region is structured  
268 according to the pattern of DN terminals. We used the NC82 neuropil stain to align to standard templates  
269 the confocal images of brain and VNC expression patterns for each of our split-GAL4 driver lines. For  
270 the brain, we used the JFRC2013 template, as described previously (Aso et al, 2014; Peng et al, 2011).

271 For the VNC, we used a VNC template derived from a female CantonS fly and performed alignment as  
272 described in Jefferis et al., 2007. We then overlaid aligned images of DNs and colored them according to  
273 whether they projected to the wing, lower tectulum, or leg layers of the VNC (Figures 7C-E). In Figure  
274 7F, we overlaid the varicose projections of these same DNs within the GNG, again colored according to  
275 their target pattern in the VNC. Our analysis shows that the three classes of DNs target different regions  
276 of the GNG and that this pattern recapitulates the dorsal to ventral ordering in the VNC. This analysis  
277 suggests that the GNG may be further divided into functional sub-regions, with possible correlation to  
278 distinct motor functions that echo those in the VNC.

279

### 280 **Organization of DN inputs**

281 As a complement to our analysis of the DNs based on their outputs in the VNC (Figure 7), we also  
282 applied k-means hierarchical clustering to the brain neuropils where the cells receive input (see Figure  
283 5F). Figure 8 shows the resulting table of DN types, sorted according to their putative input regions in the  
284 brain, along with a resulting matrix of correlation values among the brain neuropils. The analysis  
285 suggests the existence of some DN groups and associated clusters of brain neuropils, although the  
286 presence of distinct groupings are not as obvious as they were in the analysis of DN outputs in the VNC.  
287 One broad cluster consisted of cells with input dendrites in a set of posterior neuropils including the PLP,  
288 SPS, IPS, EPA, EPA, VES, and LAL. The two most densely innervated of these regions, SPS and IPS,  
289 receive input from visual projection neurons of the lobula plate. PLP also receives input from the lobula  
290 plate and contains several optic glomeruli (Panser et al., 2016). In contrast, the LAL receives projections  
291 from the central complex. Another cluster consisted of cells that innervate the PVLP, WED, GOR, and  
292 AVLP. The most densely innervated of these regions, the PVLP, contains the bulk of the optic glomeruli  
293 associated with visual projections from the lobula (Otsuna & Ito, 2006; Strausfeld & Okamura, 2007; Wu  
294 et al., 2016). The remaining clusters are less obvious, and in general few coherent patterns emerged from  
295 the analysis. For example, it is noteworthy that DNs with dendrites in the GNG tend not to have inputs in  
296 other neuropils. For this reason, the GNG does not contribute to an obvious cluster of brain regions. This  
297 observation underscores an intrinsic limitation of a cluster analysis. Despite the density of innervation, the  
298 importance of a particular brain region will be undervalued if it is associated with DNs that do not receive  
299 input from other regions as well. We conclude that DN clustering based on VNC outputs is stronger than  
300 DN clustering based on their brain inputs.

### 301 **Three prominent descending pathways**

302 Our cluster analysis in Figures 7 and 8 sought an organization of the DNs based on their output and input  
303 regions, respectively. However, the relatively ordered pattern of DN projections into motor neuropils

304 associated with specific appendages provides the opportunity to assign putative functions to the brain  
305 areas that provide their input. Thus, an alternative strategy - akin to a traditional retrograde backfill - is to  
306 visualize the regions of the brain that are innervated by cells targeting specific regions of the VNC (or  
307 vice versa, which would represent a orthograde fill). Figure 9A shows maps of the number of DNs in the  
308 brain targeting each of the 8 major neuropils of the VNC. Figure 9B shows the complimentary analysis, in  
309 which we show the number of DNs in the VNC that originate from five of the most densely innervated  
310 regions in the brain. The complete data set, from which these maps are derived, is presented in Figure 9C.

311

312 The pattern that emerged in this analysis supports the presence of three major pathways linking the brain  
313 to the VNC. Two of the pathways connect specific regions in the brain to one each of the two motor  
314 neuropils associated with the different forms of adult fly locomotion: flying and walking. The first of  
315 these is a large number of DNs connecting neuropils of the posterior slope (IPS and SPS) to the dorsal  
316 neuropils of the VNC (neck/wing/haltere neuropil and the tectulum). The existence of a major pathway  
317 linking the posterior slope and the dorsal VNC neuropils is supported by many prior studies in blowflies  
318 (Strausfeld & Gronenberg, 1990; Strausfeld & Lee, 1991). The second pathway consists of DNs  
319 connecting the GNG to the ventral neuropils of the VNC. Note that although many DNs have output  
320 synapses in the GNG, the analysis in Figure 9 is based on inputs. Thus, the enhanced connectivity seen  
321 here represents a pathway carrying information from the GNG to the leg neuromeres. Our analysis, which  
322 is based on a large number of cells, suggests that these two direct pathways represent dominant conduits  
323 of information flow from the brain to the VNC. The third pathway that emerged from our analysis  
324 consists of DNs projecting to the tectulum, the large flat neuropil sandwiched between the dorsal motor  
325 centers and the leg neuromeres, which spans all three thoracic segments. In contrast to the two direct  
326 pathways, input to the tectulum converges from a large number of neuropils distributed throughout the  
327 brain, with the notable exception of the mushroom bodies and central complex. Given that the tectulum  
328 receives input from so many different brain regions, it is tempting to postulate that this neuropil functions  
329 in behaviors requiring substantial sensory integration and motor coordination such as courtship,  
330 grooming, or escape responses whereas the direct pathways targeting the dorsal and ventral motor  
331 neuropils function more narrowly in locomotion. The pathways projecting to the other VNC neuropils  
332 (AS, AMN, VAC, mVAC) are more difficult to characterize because they include fewer of the DNs  
333 identified in this study. In general, they appear to follow a convergent pattern in that they receive input  
334 from cells originating from an array of different brain neuropils, without any obvious dominant source.  
335 One possible exception is the relatively high number of DNs connecting the PVLP with the lower  
336 tectulum, which we discuss further below.

337

338 The axons within the three major pathways distribute among 8 descending tracts in a somewhat consistent  
339 pattern (Figure 9 – figure supplement 1). DNs targeting neck, wing, and haltere neuropil descend via one  
340 of five tracts: the DLT, MDA, MTD, ITD, and VLT; however, the vast majority of cells within this  
341 pathway run within the MTD. The DNs connecting the GNG with the leg neuromeres are distributed  
342 much more evenly among a larger number of tracts: DLT, MTD, ITD, VLT, DLV, VTV. Although the  
343 DNs projecting to the tectulum arise from a large number of brain nuclei, a very large fraction of them  
344 descend via the MTD, with the smaller fraction distributed among all other major tracts.

345

### 346 **Sub-neuropil analyses of DN connectivity**

347 Our study thus far has relied upon a neuropil-to-neuropil analysis of connectivity. Whereas this is  
348 sufficient to reveal large-scale organization of descending pathways, important organization of DN  
349 synaptic connectivity likely exists at a finer, sub-neuropil resolution. Such detailed analyses are possible  
350 because we aligned data from each DN type to a standard template (see Methods). A comprehensive  
351 analysis of all sub-neuropil DN connectivity is beyond the scope of this paper; however, to demonstrate  
352 the importance of sub-neuropil organization and to further explore the sensorimotor pathways identified  
353 above, we performed more detailed analyses on three distinct examples. In the sections below, we  
354 describe the tract-based motor arrangement of both leg and wing neuropil, as well the organization of  
355 DNs descending from the optic glomeruli.

356

### 357 **Tract organization of DN input to leg motor centers**

358 Insect leg neuropil is organized into sub-compartments (Leise, 1991); sensory afferents from different  
359 classes of mechanoreceptors project to different layers within the leg neuromeres (Merritt & Murphey,  
360 1992), and the motoneurons form a myotopic map such that the position of their dendrites along the  
361 medial-lateral axis reflects the proximal-distal position of the muscles they innervate in the leg (Brierley  
362 et al, 2012; Landgraf et al, 2003). We observed that the two tracts conveying the largest number of DNs  
363 to the leg neuropil, the VLT and MTD, terminate in different strata. The VLT runs along the dorsal  
364 surface of the leg neuromeres, near the midline of the VNC, whereas the MTD, together with the DLV,  
365 fuse with the oblique tract (OT) running diagonally through each neuromere from its dorsal to ventral  
366 surface (Figure 10A).

367

368 We divided DNs with axon terminals in the leg neuromeres according to the tracts through which they  
369 descend (Figure 10B-F; see Figure 6B and Figure 9 —figure supplement 1 for tract reference). We  
370 observed two distinct axon terminal morphologies between these groups. The DNs traversing the VLT  
371 and ITD tracts end in bushy axon terminals that are restricted to the dorso-medial zone of each leg

372 neuromere (Figure 10B,D). In contrast, the termini of DNs from the MTD or DLV that pass through the  
373 OT were more linear, extending across most of the neuromere (Figure 10E,F, Figure 10 - figure  
374 supplement 1). In addition, we observed synaptotagmin labeling of DN termini throughout the entire OT  
375 (Figure 10G, bottom panels). We thus propose that leg motion is controlled by at least two different DN  
376 descending systems: one traversing the VLT, which likely contact premotor leg circuits ( $n = 12$  DN types)  
377 such as those coordinating walking or movement of the proximal leg joints, and one traversing the OT via  
378 the MTD and DLV ( $n = 7$  DN types), which have the opportunity to control motor neurons innervating  
379 muscles spanning all leg joints (Figure 10 - figure supplement 2).

380

### 381 **Tract organization of DN input to wing motor centers**

382 We identified a total of 29 different DN types supplying the wing neuropil, an area that is defined by the  
383 dendritic innervation of wing motor neurons (Leise, 1991). Compared to the extensive ramification of  
384 wing motor neurons throughout this neuropil (Vonhoff & Duch, 2010), the axonal projections of the DNs  
385 are notably sparse in most cases (Figure 11). Closer inspection of axonal trajectories revealed that wing  
386 DNs in the MTD diverge upon entering the VNC. The majority of the DNs that run in the MTD bend  
387 ventrally soon after they enter the VNC, whereas a smaller proportion continue along the dorsal surface of  
388 the nerve cord before veering ventrally in the 2<sup>nd</sup> thoracic segment to rejoin the primary MTD group  
389 (Figure 11A-E). A similar morphology has been observed in the blowfly, *Phormia*, and the dorsal portion  
390 we observe resembles the dorso-medial tract in that species (MDT; Merritt and Murphey, 1992). In  
391 general, the DNs in the ventral MTD route innervate a ventral layer of the wing neuropil, whereas those in  
392 the dorsal route terminate above them in a dorsal layer (Figure 11G). Thus, our data suggest that the wing  
393 neuropil is divisible into two thin dorsal and ventral sublayers, with different DN innervation patterns  
394 (Figure 11H). This pattern appears to correspond to a stratification of the motoneurons innervating the  
395 two functionally distinct types of flight muscle. Motoneurons of the large power muscles, whose stretch-  
396 activated oscillations drive the coarse back and forth motion of the wings, have dendrites in the dorsal-  
397 most portion of wing neuropil. In contrast, the dendrites of motoneurons innervating the much smaller  
398 steering muscles reside primarily in the ventral layer of wing neuropil (Figure 11 - figure supplement 1,2).  
399 We therefore suggest that there may be a separate set of DNs coordinating the power muscles versus the  
400 steering muscles.

401

402 The sub-neuropil scale analysis of DN projections within the leg and wing neuropils (Figures 10 and 11)  
403 suggests that DNs may cluster into groups that target different zones within the primary motor neuropils.  
404 Further studies will be necessary to determine whether these anatomically identifiable sub-compartments  
405 of VNC neuropils are functionally significant.

406

## 407 **Connecting sensory features to motor circuits**

408 As with other complex animals, flies use the same sensory information to coordinate different behaviors.  
409 In terms of descending pathway organization, this divergence could be achieved either by having  
410 redundant sensors that each convey information to a different behavioral channel, or by the same sensor  
411 sharing information with different descending pathways. The presence of both convergence and  
412 divergence of putative neuropil connectivity that we observed in the DNs is evidence for the latter  
413 architecture.

414

415 To directly examine the correspondence between sensory features and descending pathways, and as a  
416 final demonstration of DN sub-neuropil organization, we analyzed DNs that overlap with the optic  
417 glomeruli (Strausfeld & Okamura, 2007; Wu et al 2016; Panser et al., 2016), small, anatomically distinct  
418 subcompartments of the ventral and posterior lateral protocerebrum (VLP, PLP) that each receive inputs  
419 from a distinct visual projection neuron type and are suggested to encode different visual features.  
420 Individual glomeruli have been shown to act as looming detectors (Klapoetke et al., 2017), encode fast  
421 (von Reyn et al., 2017) or slow (Wu et al., 2016) looming velocities, and aid figure-ground discrimination  
422 (Aptekar et al., 2015). Furthermore, specific activation of the visual neurons projecting to distinct  
423 glomeruli elicit different behavioral phenotypes (Wu et al, 2016).

424

425 We imaged the expression pattern for each of our split-GAL4 lines at a high resolution with an NC82  
426 counter-stain. We identified individual optic glomeruli based on NC82 staining and then scored each of  
427 the DNs innervating these areas for strong, weak, or no innervation in each of the 18 identified optic  
428 glomeruli (Figure 12). Most of the ventral DNs had smooth branches in the optic glomeruli, indicating  
429 they receive input there (Figure 12 —figure supplement 1 and 2). One of the DNs, DNb05 is unusual in  
430 that it innervates both optic glomeruli and olfactory glomeruli (Figure 12 —figure supplement 3). The  
431 number of DN outputs from each optic glomeruli were non-uniform, consistent with previous findings in  
432 blowflies (Strausfeld & Okamura, 2007; Strausfeld et al., 2007). Only half of the optic glomeruli are  
433 innervated by dendrites of the DNs in this study. Two of the optic glomeruli, LC4 and LC22 (also called  
434 LPLC4; Panser et al., 2016, Wu et al., 2016) are noteworthy in providing divergent output to a large  
435 number of DNs (9 and 8 cells, respectively, Figure 12). LC4 and its neighbors, LPLC1 and LPLC2, form  
436 a cluster of densely innervated optic glomeruli in the ventral lateral protocerebrum (Figure 12 —figure  
437 supplement 1), whereas LC22 and a nearby glomerulus, LPLC3, constitute a more posterior group (Figure  
438 12 —figure supplement 2).

439

440 The LC4 glomerulus is of particular interest because it is innervated by the giant fiber (GF, designated  
441 DNp01 in our nomenclature). The GF neuron has been analyzed in great detail both anatomically (Power,  
442 1948, Levine & Tracy, 1973; Koto et al., 1981; Strausfeld & Bassemir, 1983) and physiologically (Levine  
443 & Tracy, 1973;; Wyman et al, 1984; Mu et al, 2014; Fotowat et al., 2009; von Reyn et al., 2014; von  
444 Reyn et al., 2017) and is critical for a fast mode of escape takeoff in which the fly jumps into the air  
445 without prior coordination of its wings (von Reyn et al., 2014). Recent work has confirmed that LC4  
446 neurons are functionally presynaptic to the GF and convey information about high-velocity looming  
447 expansion, such as that caused by an attacking predator (von Reyn et al., 2017). Milde & Strausfeld  
448 (1990) previously suggested that the GF in a larger species of fly was a member of a cluster of descending  
449 neurons with overlapping dendrites that targeted different areas of the VNC. Here, we have identified a  
450 group of ventral DNs that all have dendrites in the LC4 glomerulus (Figures 13, see also Figure 12 —  
451 figure supplement 1). Although these cells vary widely in their dendritic morphology, all of them  
452 arborized within the LC4 glomerulus, and six of them also extend dendrites into the LPLC2 glomerulus,  
453 also innervated by GF dendrites.

454

455 The ramifications within the LC4 glomerulus differ slightly among these LC4 DNs (Figure 13B). For  
456 example, DNp04 innervates the entire glomerulus, whereas DNp02 innervation is confined to the ventral  
457 portion of the LC4 glomerulus (Figure 13B). Three out of the nine DN types project to leg neuropils  
458 (DNp02, DNp05 & DNp11; Figure 13C-D), one projects to the wing neuropil, and the majority (6/9)  
459 target the lower tectulum, which is also targeted by the GF. The dendrite of the tergotrochanteral motor  
460 neuron and the peripheral synapsing interneuron - both of which are the crucial components for fly escape  
461 takeoffs - are present in the lower tectulum and show gap-junction coupling with the GF (King &  
462 Wyman, 1980; Blagburn et al., 1999). In addition, we found several interneurons that connect the lower  
463 tectulum with other VNC compartments, including leg and wing neuropil (Figure 4 —figure supplement  
464 2), suggesting the functional importance of circuits in the lower tectulum, similar to those in the tectulum  
465 layer above it, for coordinating actions that involve both leg and wing appendages.

466

467

## 468 **DISCUSSION**

469

470 In this study, we systematically characterized the organization of DNs, a population of interneurons that  
471 conduct information from the brain of a fly to motor centers in the VNC. Our analysis was based on the  
472 morphologies of 98 DN cell types, covering 190 bilateral pairs of neurons. To discern DN morphologies,

473 we segmented individual neurons from driver lines targeting many cells, and we also generated a library  
474 of 133 split-GAL4 lines that sparsely target 54 DN types. By registering the morphology of all the DNs  
475 with standardized maps of the brain and VNC, we identified three major sensory-motor pathways  
476 (Figures 7 and 9). One pathway links two neuropils on the posterior slope of the brain (IPS and SPS) to  
477 dorsal neuropils associated with the neck, wing, and haltere motor systems, and a second carries neurons  
478 with dendrites in the GNG to the leg neuromeres. The third pathway consists of DNs originating from an  
479 array of brain neuropils that converge to innervate the tectulum, a long thin region of the VNC  
480 sandwiched between the wing and leg motor neuropils (Figure 14A, B).

481  
482 The simple, tripartite anatomical pattern we observe may reflect both the functional organization of the  
483 DNs as well as the evolutionary history of *Drosophila*. With the notable exception of insects (and the  
484 mythical horse, Pegasus), all flying animals use a modified foreleg as a wing (Gatesy & Dial, 1996;  
485 Thewissen and Babcock, 1991; Prokop et al., 2017; Seki et al., 2017). That is, an appendage originally  
486 evolved for walking was coopted for flight in pterosaurs, birds, and bats — a fact supported by the fossil  
487 record, comparative morphology, and the organization of the underlying motor circuitry (Gross &  
488 Oppenheim, 1985; Ryan et al., 1998). The evolution of flight was quite different in insects, because their  
489 wings and associated muscles, did not arise via transformation of an entire ancestral leg (Kukalova-Peck,  
490 1978; Dudley, 1994), and thus the novel aerial mode of locomotion did not strongly compromise the more  
491 ancient, terrestrial mode. As a result, insects are unique in possessing two somewhat independent motor  
492 systems, a fact that is elegantly manifest in the organization of the VNC and the pattern of DN  
493 innervation that we observed: the ventral leg neuromeres of flies resemble those of apterygote hexapods  
494 from which they derived, whereas the more recent wing neuropil sits atop the VNC like icing on a cake.  
495 We speculate that the GNG-to-leg neuromere descending pathway represents a very ancient pathway and  
496 some of its member DNs may have deep homologies with other arthropod taxa, whereas the pathway  
497 linking the posterior slope neuropils to the dorsal motor neuropils of the neck, wing, and haltere are more  
498 recently evolved within insects.

499  
500 Many behaviors such as grooming, courtship, take-off, and landing require the simultaneous use of both  
501 legs and wings. Thus, insects must have a means of coordinating activity across the two motor systems, a  
502 need that arose during or after the evolution of flight. As described more fully below, we speculate that  
503 the tectulum, and possibly the lower tectulum, are neuropils that mediate this functional integration of  
504 motor actions between the two systems. The convergence of DNs into the tectulum from such a broad  
505 array of brain nuclei may reflect the high degree of sensory integration required to trigger and regulate  
506 these more complex, multi-appendage behaviors.



507

## 508 **Estimating DN number**

509 Based on PA-GFP labeling of neurons in the neck connective, we counted ~350 DN pairs. This is within  
510 the range of 200-500 DN pairs estimated in other insect species (Gronenberg & Strausfeld, 1990; Okada  
511 et al., 2003; Staudacher, 1998; Gal & Libersat, 2006), but smaller than a value of ~550 pairs estimated in  
512 *Drosophila* based on backfills using a dextran dye (Hsu & Bhandawat, 2016). Part of this discrepancy  
513 can be explained by the fact that our count excluded several specialized cell populations that were  
514 included by Hsu and Bhandawat (2016). These include a set of ~19 pairs of neck motor neurons  
515 (Strausfeld & Seyan, 1985), whose axons exit the neck connective posterior to the region we illuminated  
516 for PA-GFP photoconversion (Sandeman & Markl, 1980), as well as 16 neurons selectively innervating  
517 the retrocerebral complex (Shiga et al., 2000). We did, however, include one of these cells (DNd01),  
518 which innervates both the VNC and retrocerebral complex. Our analysis is also likely an underestimate  
519 of the total because the *nsyb*-LexA driver line we used to pan-neuronally express PA-GFP, may not label  
520 all neurons. For example, this line does not label the Giant Fiber. It is also possible that certain cells are  
521 harder to label using the PA-GFP approach as opposed to dextran backfills. The estimates from the two  
522 studies agree quite closely for DNs with cell bodies in the cerebral ganglia (172 in this study vs. 206 in  
523 Hsu & Bhandawat, 2016). Most of the discrepancy concerns DNs in the GNG group; we counted 180  
524 pairs, only 51% of the number reported by Hsu & Bhandawat. Taking our estimate of 350 as a lower  
525 bound and 550 an upper bound, we estimate that the DNs we have described in this study represent  
526 between one third and one half of the entire population.

527

528 Identification of particular DN types in our study relied on the existence of a GAL4-line in the Rubin  
529 (Jenett et al., 2012) or Vienna (BrainBase, <http://brainbase.imp.ac.at/>) collection with sparse enough  
530 expression to recognize individual DN morphology. Additionally, most of the expression patterns we  
531 screened were from female flies, thus our analysis would not include any potential male-specific DNs. As  
532 a result, we did not find some DNs that have been reported in other studies, including the Moonwalker  
533 Descending Neuron (MDN), which controls backwards walking in flies (Bidaye et al., 2014), and  
534 pIP10/p2b (von Philipsborn et al., 2011; Kohatsu et al., 2011), which are involved in the male courtship  
535 sequence.

536

## 537 **Pathways to wing neuropil**

538 We found a direct pathway linking the posterior slope of the brain to dorsal VNC neuropils. The  
539 posterior slope is innervated by lobula plate tangential cells (LPTCs) projecting from the optic lobe,

540 which are excited by patterns of optic flow resulting from self-rotation (Krapp and Hengstenberg 1996;  
541 Borst et al., 2010). These optic flow patterns are especially relevant during flight, when the fly is able to  
542 move freely about all six degrees of freedom, and it has been suggested that LPTCs mediate both  
543 corrective steering maneuvers of the wings (Wertz et al., 2008; Haikala et al., 2013; Kim et al., 2015) as  
544 well as gaze stabilization of the head (Strausfeld et al., 1987; Milde et al., 1987; Huston & Krapp, 2008;  
545 Kim et al., 2017; see also review, Borst et al., 2010; Egelhaaf et al., 2012). Most of the DNs in this  
546 pathway targeted all three segmental dorsal VNC neuropils, which contain neck (T1), wing (T2), or  
547 haltere (T3) motor neurons (Figure 7B), sensory neuron projections from associated mechanoreceptors  
548 (Chan & Dickinson, 1996; Fayyazuddin & Dickinson, 1996), and premotor interneurons (Strausfeld &  
549 Seyan, 1985). DN innervation of all three segmental dorsal neuropils is consistent with recent studies  
550 showing that neck and wing movements are highly correlated (Suver et al., 2016, Kim et al., 2017) and  
551 suggests that the DNs of this major posterior slope-to-dorsal neuropil pathway are involved in flight  
552 control. This notion is confirmed by recent whole cell recordings from tethered flying flies showing that  
553 three members of this populations are strongly correlated with compensatory visual responses (Suver et  
554 al., 2016), and another is involved with spontaneous turns and collision avoidance (Schnell et al., 2017).

555 A similar pathway, in which DNs receiving inputs in the posterior slope target flight neuropil, has been  
556 observed in blowflies and flesh flies (Strausfeld & Lee, 1991). Strausfeld & Lee contrasted these with  
557 other DNs in the protocerebrum that have anterior dendrites near the outputs of the lobula that project to  
558 ventral leg neuropils. They suggested that the posterior and anterior DN protocerebral pathways are  
559 parallel systems linked to separate photoreceptor channels that process different features of the visual  
560 scene (e.g. color vs. motion) and may be loosely analogous to the dorsal and ventral streams of the  
561 mammalian visual system (Strausfeld & Lee, 1991). Our dataset allowed us to evaluate this hypothesis in  
562 *Drosophila* by examining the subset of 42 DNs with dendrites in the protocerebrum (Figure 15). In  
563 keeping with the observations from large fly species, we did find examples in which a DN with more  
564 posterior dendrites (e.g. DN<sub>g02</sub>, Figure 15A, *left*) projected to the dorsal part of the VNC, whereas a DN  
565 with anterior dendrites (e.g. DN<sub>g13</sub>, Figure 15A, *right*) projected to the ventral leg neuropils (see also  
566 Figure 15B-C). We also found that the median location of a DN's dendrites along anterior-posterior axis  
567 largely predicted whether its axons targeted dorsal or ventral leg neuropil (Figure 15D; though see  
568 exceptions DN<sub>b01</sub>, DN<sub>b06</sub>, DN<sub>p07</sub>, and DN<sub>p18</sub>). However, we found that the dendritic locations of  
569 DNs projecting to the dorsal and leg neuropils of the VNC are not segregated into separable, parallel  
570 groups, but instead form a continuous pattern of innervation in the protocerebrum. That is, the DN  
571 representation is graded in the protocerebrum, at least at the level of resolution of our analysis.  
572 Furthermore, the dendritic arbors of many DNs are broad enough that they sample from both anterior and

573 posterior regions of the protocerebrum, suggesting that many DNs integrate information from both the  
574 lobula and lobula plate. Rather than the two separate parallel pathways suggested by Strausfeld and Lee  
575 (1991) — one carrying visual information from the lobula plate to the wing neuropil and the other  
576 carrying information from the lobula to the leg neuropil — we propose that there is a mixing of this visual  
577 information in the protocerebrum, possibly in a graded manner along the anterior-posterior axis (Figure  
578 15E). A similar divergence and convergence of connectivity has been described in the brainstem of mice.  
579 Brainstem nuclei differentially address spinal circuits, forming exclusive connections either with  
580 forelimbs, hindlimbs, or both with differing connection strength (Esposito et al., 2014).

581  
582 Among all DNs targeting the wing neuropil, we found evidence for at least two distinct control systems,  
583 one entering the neuropil from a dorsal tract and targeting the dorsal and medial portion of the wing  
584 neuropil layer, where power muscle motor neuron dendrites reside, and one entering the neuropil from a  
585 more ventral tract and invading primarily the ventral and medial wing neuropil, where many steering  
586 muscle motor neurons dendrites reside (Figure 14C, D). In *Drosophila*, the power muscles comprise two  
587 sets of stretch activated muscles attached across the thorax orthogonally (Dickinson & Tu, 1997).  
588 Alternate deformation of the thoracic cavity by these muscles drives the wing stroke indirectly, powering  
589 both flight and courtship song. In contrast, the smaller steering muscles attach to the base of the wing  
590 hinge and act directly to coordinate the wing movements that change flight course (Heide & Götz, 1996;  
591 Lindsay et al., 207), or actuate finer movement, such as the timing of song pulses (Ewing, 1979). Our  
592 results suggest separate descending control of the power and steering muscle systems. Outside of flight  
593 and song, flies perform a wide range of different behaviors with their wings, including grooming  
594 (Szebenyi, 1969), aggressive displays (Dow & von Schilcher, 1975), and preparation for takeoff  
595 (Trimarchi & Schneiderman, 1995). Although we found that the posterior slope had the largest number of  
596 DNs innervating wing neuropil, a wide range of other brain neuropils, including the GNG, VES, PLP,  
597 AMMC, SAD, SMP, and LAL, are also connected to the wing neuropil, albeit via a smaller number of  
598 DNs. These sparser pathways may be important for coordinating wing motion when the flies are not  
599 flying.

600

## 601 **Pathways to leg neuropils**

602 Despite the trend described in the previous section, in which DNs with more anterior dendrites in the  
603 protocerebrum tend to target leg neuropil, our analysis (Figure 9) found that a different brain region, the  
604 GNG, had the strongest DN connectivity to the six ventral neuromeres of the VNC. This was true even  
605 after excluding the many DNs whose neurites are presynaptic in the GNG. Indeed, 90% (88/98) of the  
606 DN types we found have processes in the GNG, most of which are varicose terminals containing

607 synaptogagmin, and thus likely output terminals. We found that only one third (29/88) of DNs with  
608 processes in the GNG had dendrites in that region, two thirds of which (18/29) target leg neuropil without  
609 any terminals in the dorsal wing, neck, or haltere neuropils.

610

611 Given the GNG's evolutionary history as a separate anterior segmental ganglion (Niven et al., 2008), it is  
612 perhaps not surprising that this neuropil is strongly connected to more posterior motor centers. The  
613 suboesophageal ganglion, which includes the GNG (Ito et al, 2014), is involved in a variety of behaviors,  
614 including walking (Kien & Williams, 1983; mantis, Roeder, 1937; locust, Kien, 1990a,b; stick insect,  
615 Graham, 1979a,b; and cockroach, Bässler et al., 1985), stridulation (Hedwig, 1986, 1994; Lins & Elsner  
616 1995), flight initiation (Ramirez, 1988), head movement (Altman & Kien, 1979; Kien & Altmnn, 1984),  
617 and respiration (Ramirez, 1998; Otto & Janizewski, 1989; Otto & Hennig, 1993). However, the GNG has  
618 been most specifically implicated in the temporal patterning of walking (Kien, 1983, 1990a, b; Kien &  
619 Altman, 1984, 1992; Gal & Libersat, 2006). For example, both supra- and subesophageal DNs are  
620 recruited in the preparatory phase before walking (Kien, 1990a), whereas the activity of subesophageal  
621 DNs become predominant during the walking phase (Kien, 1990a,b).

622

623 We found that the terminals of DNs targeting the same layers of the VNC clustered together within the  
624 GNG (Figure 7F). One intriguing possibility is that these foci represent regions in which efferent copies  
625 of descending commands to leg and wing motor centers are available to cephalic sensory circuits. This  
626 information could then be integrated directly with other descending commands within the GNG, or  
627 reciprocal connections could feed the information back to the cerebral ganglia. Given that the cerebral  
628 ganglia are known to have a strong inhibitory effect on walking in insects, another possibility is that some  
629 DN terminals in the GNG are inhibitory. Indeed, a recent study found that 37% of DNs express the  
630 inhibitory neurotransmitter GABA, compared to 38% that are cholinergic (Hsu & Bhandawat, 2016), and  
631 just such an inhibitory pathway from the cerebral ganglia to the GNG has been suggested based on prior  
632 behavioral experiments (Roeder, 1937; Gal & Libersat, 2006). For example, lesion studies have shown  
633 that walking persists when the cerebral ganglia are removed and spontaneous bouts are prolonged  
634 (Roeder, 1937; Kien, 1983). In contrast, removal of the GNG reduces spontaneous walking (Kien, 1983;  
635 Johnston et al., 1999), but prolongs flight duration (Gal & Libersat, 2006). Thus it is possible that the DN  
636 pathway we identified linking the posterior slope to wing neuropil maintains flight and inhibits walking,  
637 whereas the pathway linking the GNG to the leg neuropils maintains walking and inhibits flight. Thus, the  
638 connections within the GNG may play a critical role in action selection, at least at a coarse level.

639

640 We found that DN terminals in the leg neuropils could be sorted into two major types: DNs projecting to  
641 the dorso-medial part of each neuromere (type-I) and DNs penetrating through the neuromeres via the  
642 oblique tract (type-II) (Figures 10 and 14E, F). Their terminal locations suggest that type-I and type-II  
643 leg DNs may have different access to leg motor neurons because the dendrites are known to form a rough  
644 myotopic map across the leg neuromere, with more proximal leg muscles having more proximal dendrites  
645 (Brierley et al., 2012). Based on this arrangement, one possible function of the type-I leg DNs is to  
646 coordinate the direction of walking, which depends critically on the control of coxal muscles that protract  
647 and retract of the entire leg. Indeed, inverse activation of the thoraco-coxal muscle is required for  
648 switching from forward to backward walking in stick insects (Graham & Epstein, 1985; Rosenbaum et  
649 al., 2010). In *Drosophila*, moonwalker DNs (MDNs) innervate the dorso-medial part of the leg neuropil  
650 and thus are classified as type-I (Bidaye et al., 2014). Activation of bilateral MDNs cause backward  
651 locomotion, whereas the unilateral activation cause backward turning toward the contralateral side (Sen et  
652 al., 2017). Type-II DNs running through the oblique tract have the opportunity to contact with the entire  
653 array of proximal and distal motor neurons and thus may be important for coordinated action of all leg  
654 segments. For example, the jumping part of escape takeoffs may require tension in all leg segments, even  
655 though the extrinsic muscle extending the trochanter is the primary actor for the fast takeoff mode  
656 (Trimarchi & Schneiderman, 1993; von Reyn et al., 2014). Consistent with this idea, type-II DNs are  
657 abundant in mesothoracic leg neuropil (DNp02, p05, p06 and p11), and it is the middle legs that flies  
658 extend during a jump. Similarly, in locust, the descending contralateral movement detector (DCMD,  
659 O’Shea et al., 1974), which is important for escape behavior, has terminals that resemble type-II and  
660 synapses directly on the motor neurons in the neuropil associated with the jumping legs.

661

## 662 **Lower tectulum**

663 We identified a small population of nine DNs specifically projecting to an intermediate zone of the VNC,  
664 the lower tectulum, which occupies a volume distinct from wing and leg neuropils and which we suggest  
665 can be distinguished from the other intermediate neuropil, the tectulum, that sits above it (Figure 13).  
666 Neuronal connectivity is not well described in this region, and its function is unknown. However, our  
667 observations suggest that, like the tectulum, it is an integrative area involved in both leg and wing control.  
668 For example, this region includes dendrites from both the tergotrochanteral leg motor neuron (TTMn)  
669 (Figure 4—figure supplement 2A) and a branch of a wing motor neuron that we have tentatively  
670 identified as III1 (Figure 4—figure supplement 2E). The lower tectulum also contains the peripheral  
671 synapsing interneuron (PSI) (Bacon & Strausfeld, 1986), which is presynaptic to motor neurons for the  
672 wing depressor muscles (Figure 4—figure supplement 2B). The giant fiber (GF) descending neurons that  
673 drive a looming-evoked escape takeoff terminate with unbranched axons within the lower tectulum and

674 form gap junctions with the TTMn and PSI (King and Wyman, 1980; Wyman et al., 1984). We thus  
675 surmise that the lower tectulum may play a role during takeoff, which requires coordinated actions of the  
676 wings and legs. It is known that there are parallel pathways for take-off behavior in *Drosophila*  
677 (Hammond & O'Shea, 2007; Card & Dickinson, 2008b; Fotowat et al., 2009; von Reyn et al, 2014),  
678 although the anatomical source has not yet been identified. We identified a group of eight unique type  
679 DNs, in addition to the GF, whose dendrites overlap with the terminals of visual projection neurons that  
680 detect looming (von Reyn et al., 2017; Klapoetke et al., 2017). Most of these invade the lower tectulum  
681 and their axon terminals share some anatomical features with the GF (Figure 13). This population are  
682 candidates for parallel pathways for takeoff, as well as other looming-evoked evasive behaviors (Card &  
683 Dickinson, 2008a, b; Card, 2012), and could represent circuits for wing-leg coordination.

684

### 685 **Candidate descending pathways from higher order centers**

686 We did not find any DNs that originate in the central complex (CX) (Figures 5F and 6A), consistent with  
687 studies in other insect species (Strausfeld, 1976; Heinrich, 2002; Gronenberg et al., 1995; Ito et al., 1998).  
688 Thus, information from the CX must be relayed to motor centers via other brain regions. A prime  
689 candidate is the the lateral accessory lobe (LAL), which has dense mutual connections with the CX and,  
690 together with the bulb (BU), is considered the CX primary output (Strausfeld & Hirth, 2013; Heinze et al.,  
691 2013; Lin et al., 2013; Wolff et al., 2015; Shih et al., 2015; Stone et al., 2017). However, we find many  
692 fewer DNs from the LAL than from other regions such as PS, PVLP or AMMC (Figure 4A). In other  
693 insects such as silk moths, connections between the LAL and the PS are well documented (Namiki et al.,  
694 2014; Namiki & Kanzaki, 2016). In *Drosophila*, connectivity between the LAL and PS is suggested by  
695 connectomics studies (Chiang et al., 2011; Ito et al., 2013; Yu et al., 2013; Shih et al., 2015) and the  
696 morphology of individual neurons connecting these regions has been recently described (Chiang et al.,  
697 2011; Costa et al., 2016, e.g. neuron cluster 31, available from NBLAST web site). Thus we suggest  
698 information processed in the CX may descend to the VNC via a CX-LAL-PS pathway.

699

700 We also did not find any DNs originating from the mushroom bodies (MB), important processing areas  
701 for olfactory and visual memory (Heisenberg, 2003). However, there are 11 DN types innervating the  
702 superior medial protocerebrum (SMP), a major target of MB output neurons (Aso et al., 2014). The SMP  
703 is also well connected with the LAL (Ito et al., 2013; Yu et al., 2013; Namiki & Kanzaki, 2016), which  
704 suggests MB output also uses the major descending pathway from the posterior slope via the LAL.

705

### 706 **Behavioral function of DNs**

707 Prior studies in insects have focused on DN function at the single neuron level. Thus how DNs operate as  
708 a population is still unclear. Evidence in insects and other species suggests that motor directives are likely  
709 encoded across the DN population rather than in the activity of individual command neurons (Erickson,  
710 1968; Kien 1983; Borgmann & Büschges, 2015). For example, many DNs are active, albeit with different  
711 firing patterns, at the same time during walking in locusts (Kien, 1990a, b), and there are multiple brain  
712 locations where electrical stimulation can trigger walking behavior in cockroaches (Kien, 1983; Kien &  
713 Williams, 1983). Also, population vector coding for object direction has been observed in the DNs of  
714 dragonflies (Gonzalez-Bellido et al., 2013). Zebrafish have also been shown to utilize population coding  
715 in the control of locomotion, despite having only ~220 DNs (Kimmel et al., 1985; Mectcalfe et al., 1986)  
716 — even fewer than *Drosophila*. In fact, there are very few neurons that fit the rigorous requirements of  
717 command neuron (i.e. necessary and sufficient), proposed by Kupfermann & Weiss (1978). Even the  
718 giant fibers (a.k.a. DNp01), whose activation drives a stereotyped escape jump in response to looming  
719 stimuli, are necessary only for a particular ‘fast mode’ of takeoff, and the behavioral effect of their  
720 activation to naturalistic looming stimuli has been shown to depend on the timing of their spike relative to  
721 activity in other descending neurons (von Reyn et al, 2014).

722

723 Our study found that the VNC areas receiving the largest number of DNs are the dorsal neuropils  
724 associated with flight control (neck, wing, haltere neuropils and tectulum). It has been suggested that the  
725 number of DNs engaged during a behavior might relate to the precision of the control. In mammals, for  
726 example, the number of activated corticospinal tract neurons corresponds to the degree of digital dexterity  
727 (Haffner & Masterton, 1975, 1983). It is possible a large DN population target flight neuropils because  
728 flight requires a high level of precise control. For example, flies can execute sophisticated rapid aerial  
729 turns to evade a looming predator (Muijres et al, 2014), movements that are controlled by a combination  
730 of adjustments in firing phase of tonically active motor neurons and recruitment of phasically active cells  
731 (Balint & Dickinson, 2001; Lindsay et al., 2017).

732

733 In addition to the number of DNs putatively assigned to wing control, our study found that the  
734 organization of wing DNs is different than that of the DNs targeting leg neuropil. We identified several  
735 distinct clusters of DNs with nearly identical morphologies and highly overlapped input and output  
736 projections, which we refer to as population type DNs because their similar morphology suggests they  
737 may function as a group (e.g. DNg01, g02, g03, g05 and g06, Figure 2—figure supplement 3). In most  
738 cases, these population DNs project to the wing neuropil or tectulum and are thus likely involved in flight.  
739 In contrast, we found only unique type DNs (identifiable single bilateral pairs) projecting to leg neuropil.  
740 This suggests that the strategy for controlling flight and walking may be fundamentally different. Because

741 of the physics involved, even very small changes in wing motion during flight can result in large  
742 aerodynamic forces and moments (Muijres et al, 2014). The necessity for fine control might account for  
743 the greater dependence on population coding in flight as compared to walking. Another difference  
744 between flight and walking is the temporal scale required for control. For example, wingbeat frequency is  
745 much faster than leg stepping frequency. The control of force generation by wing steering muscles  
746 depends on the precise timing of motor neuron spikes (Tu & Dickinson, 1994, 1996). The descending  
747 input during flight must have the capacity to regulate motor neuron firing phase on a precise temporal  
748 scale, a functionality that might be achieved via population coding (Lehmann & Bartussek, 2017).  
749 Another possibility is that the number of active DNs encodes the magnitude of a command signal to  
750 regulate continuous locomotor parameters such as speed. In larval zebrafish and lamprey, for example,  
751 more reticulospinal DNs are recruited with increasing swimming frequency (Brocard & Dubuc, 2003).  
752 Further functional studies will be required to test whether DN encoding of flight and walking commands  
753 operates by different principles.

754

755 We analyzed the neuronal organization of descending motor pathways in *Drosophila*, with single-cell  
756 resolution. The wiring diagram revealed, in a genetically accessible model system, creates a framework  
757 for our understanding of how the brain controls behavior. In combination with the *Drosophila* genetic  
758 toolkit, the driver lines created in the present study open up the possibility to directly probe the function  
759 of individual DNs during natural behavior.



760

## 761 **EXPERIMENTAL PROCEDURES**

762

### 763 **Mass-staining of DNs with photoactivatable GFP**

764 To quantify the number of neurons with cell bodies in the brain and axonal projections into the VNC, we  
765 pan-neuronally expressed photoactivatable GFP (PA-GFP) using the following fly stock: w<sup>1118</sup>;  
766 pJFRC22-10XUAS-IVS-myr::tdTomato (attP40) / CyO; pJFRC93-13XLexAop2-IVS-Syn21-mPA-p10  
767 (VK00005), nsyb-LexAop65 (attP2) / TM2. This line drives the PA-GFP construct, mPA-LexAop (Pfeiffer  
768 et al, 2012; Patterson and Lippincott-Schwartz, 2002), under control of the *neuronal synaptobrevin*  
769 promoter, *nsyb*-LexA (also known as R57C10-LexA; Jennet et al 2012), which codes for a synaptic  
770 vesicle protein that should be present in most neurons. Photoactivation was performed on adult female  
771 progeny aged 0-1 days after eclosion. The central nervous system was dissected intact and kept in saline  
772 solution. Using a two-photon microscope (Zeiss LSM 710), we scanned a volume of the neck connective  
773 posterior to the cervical nerve every five minutes for one hour with 408 nm light. After the activation, the  
774 brain was imaged, first from the anterior surface, and then from the posterior surface, by flipping the  
775 sample. Labeled cell bodies in the brain were counted manually in four preparations.

776

### 777 **Screening for DNs**

778 To identify driver lines containing specific DN morphologies, we manually searched the brain and VNC  
779 expression pattern images of approximately 9000 GAL4 driver lines from publically available GAL4  
780 lines in the Janelia FlyLight collection (<http://flweb.janelia.org>, Jennett et al., 2012) for neurons with an  
781 axon in the neck connective and a cell body in the brain. To make individual neuron morphology more  
782 clear and to help distinguish DNs from ascending neurons, we used *teashirt* (*tsh*), a transcription factor  
783 specifying the VNC (Röder et al., 1992; Simpson, 2016). We chose 586 GAL4 lines with connective  
784 expression and crossed these to a line with *tsh*-LexA, LexAop2-GAL80, and a GFP reporter (w; *tsh*-  
785 LexAop65, pJFRC20-8XLexAop2-IVS-GAL80-WPRE (su(Hw)attP5), pJFRC28-10XUAS-IVS-GFP-p10  
786 (attP40)/CyO, TB-RFP; Simpson, 2016; Pfeiffer et al., 2010). For the progeny, this suppressed expression  
787 in most neurons originating in the VNC, allowing us to clearly visualize the morphologies of any DN  
788 axon terminals (see Expression pattern visualization below). We generated approximately 200 new  
789 transgenic lines using enhancers identified in our screen to express either the GAL4 transcription  
790 activation domain (p65ADZp) or the DNA binding domain (ZpGAL4DBD). New lines were made using  
791 vectors from Pfeiffer et al., 2010.

792

### 793 **Expression pattern visualization**

794 Expression patterns of GAL4 driver lines crossed with *tsh*-LexA were obtained by CNS dissection,  
795 immunohistochemistry, and confocal imaging. We used the standard Janelia FlyLight protocols (based  
796 on Jennett et al., 2012), available at <https://www.janelia.org/project-team/flylight/protocols>, which we  
797 describe briefly here. The complete central nervous systems of 3–5-day-old female adult progeny were  
798 dissected in S2 media (Schneider’s Insect Medium, Sigma), fixed in paraformaldehyde, and transferred to  
799 a goat serum blocking buffer for one hour. The buffer was then replaced with the primary antibodies  
800 (mouse nc82 supernatant at 1:30, rabbit polyclonal anti-GFP at 1:1000) diluted in phosphate buffered  
801 saline with 0.5% Triton X-100 (PBT) and rocked at 4°C for 36-48 hours. After washing with PBT, the  
802 samples were next incubated with secondary antibodies (Alexa Fluor 488 goat anti-rabbit, and Alexa  
803 Fluor 568 goat anti-mouse at 1:400) diluted in PBT and rocked at 4°C for three days. Next, samples were  
804 washed, fixed again in paraformaldehyde, mounted on a poly-L-lysine cover slip, cleared with xylene,  
805 and embedded in dibutyl phthalate in xylene (DPX) on a standard microscope slide with spacers. After  
806 drying for two days, samples were imaged at 20X with a confocal microscope (Zeiss LSM 510).

807

### 808 **Split-GAL4 intersections**

809 Based on our screening of GAL4 and GAL4 with *teashirt* lines, we selected AD/DBD combinations that  
810 we thought shared expression in individual DNs. To visualize combined expression patterns, we crossed  
811 males carrying a GFP reporter (pJFRC200-10XUASIVS-myr::smGFP-HA in attP18) and the  
812 ZpGAL4DBD transgene (in attP2) with virgin females carrying the p65ADZp transgene in either  
813 su(Hw)attP8, attP40, or VK00027 and examined expression in 3- to 10-day old female progeny as  
814 described above. The split-GAL4 combinations that we deemed sparse enough to include in our DN  
815 collection were made homozygous for the AD and DBD transgenes. To obtain polarity and higher  
816 resolution (40x, 63x) information on selected lines, split-GAL4 lines were crossed to pJFRC51-3xUAS-  
817 Syt::smGFP-HA in su(Hw) attP1; pJFRC225-5xUAS-IVS-myr::smGFP-FLAG in VK00005 and  
818 processed for imaging as above. We used the multicolor flip out technique to stochastically label  
819 individual neurons in lines that contained multiple cells (Nern *et al.*, 2015). These protocols are available  
820 on the Janelia FlyLight website (<https://www.janelia.org/project-team/flylight/protocols>). Some split-  
821 GAL4 lines were also crossed to 20XUAS-CsChrimson-mVenus trafficked in attP18 (virginator stock)  
822 and processed as above to visualize expression pattern when using the CsChrimson effector as observed  
823 expression patterns are known to vary slightly depending on the reporter used (Aso *et al.*, 2014). Confocal  
824 image stacks of the stabilized split-GAL4 intersections will be made available online  
825 (<http://www.janelia.org/split-gal4>).

826

## 827 **Terminology and neuropil annotation**

828 We operationally define a DN as a neuron that: (1) connects brain and VNC with an axon through the  
829 neck connective, and (2) has its cell body in the brain. We did not include ascending neurons and neck  
830 motor neurons in this analysis. For the physical definitions and nomenclature of the brain neuropils, we  
831 followed the virtual fly brain (<http://www.virtualflybrain.org/>; Ito et al. 2014). Abbreviations used in the  
832 document are summarized in Supplementary Table 6. For the terminology of the VNC, we primarily  
833 followed Power (1948), Merritt & Murphey (1992) and Boerner & Duch (2010) and introduced some new  
834 formal standards also described in Court et al., 2017. DNs are named with first two letters ‘DN’ followed  
835 by a single letter indicating the location of the cell body (a, anterior dorsal; b, anterior ventral; c, pars  
836 intercerebralis; d, outside cluster on anterior surface; g, gnathal ganglion; p, posterior surface; x, outside  
837 brain) and then a two-digit number assigned randomly (roughly in discovery order) within each cell body  
838 group.

839

## 840 **Image processing**

841 Neuron and neuropil tracing was carried out semi-manually using Amira 5.4.3 (Visage Imaging, Fuerth,  
842 Germany). For the reconstruction of neuropils, individual objects were smoothed using the ‘smooth label’  
843 function after the manual tracing. Volume rendering was performed using Amira ‘generate surface’  
844 function. Segmentation data for the brain in some figures (Figures 6 and 9) were obtained from Virtual  
845 Fly Brain (<https://github.com/VirtualFlyBrain/DrosAdultBRAINDomains>). Segmentation data for the  
846 neuronal tracts in the VNC was kindly provided by Jana Boerner (Boerner & Duch, 2010). For images of  
847 single DN morphology, masked images were used for visualization. We performed segmentation for  
848 individual neurons in the confocal stacks of generation-1 GAL4 lines with sparse expression pattern or  
849 split-GAL4 lines. We first detected the signal with the Amira ‘Interactive Thresholding’ function. We  
850 then corrected any false detection by manual tracing. Using this image as a mask, we obtained the final  
851 masked images shown in the figures using a custom-made program written in MATLAB and the image  
852 processing toolbox (MathWorks, Natick, MA, USA). The contrast and brightness of images were  
853 modified in Image J (National Institutes of Health, Bethesda, MD). Figures were prepared in Adobe  
854 Illustrator CS (Adobe systems, San Jose, CA).

855

856 Confocal image stacks of split-GAL4 expression patterns in the brain were aligned to standardized brain  
857 template JFRC2013 (available here: <https://github.com/jefferislab/BridgingRegistrations>) as part of an  
858 established processing pipeline (Aso et al, 2014; Peng et al, 2011). A similar template was derived from  
859 the NC82 expression pattern in the VNC of an example female CantonS fly imaged by the FlyLight  
860 Project team (template is available here:

861 [https://github.com/VirtualFlyBrain/DrosAdultVNSdomains/blob/master/template/Neuropil\\_185.nrrd](https://github.com/VirtualFlyBrain/DrosAdultVNSdomains/blob/master/template/Neuropil_185.nrrd)).

862 Our VNC alignment pipeline was adapted from Court (2017). Briefly: confocal VNC stacks were first  
863 converted to an 8-bit nrrd file format, preprocessed using the NC82 reference channel to normalize  
864 contrast across samples, rotated to approximately orient the VNC along the anterior-posterior axis, then  
865 the reference channel was aligned to the template by nonrigid warping (Rohlfing & Maurer, 2003) using  
866 the Computational Morphometry Toolkit (<https://www.nitrc.org/projects/cmtk/>), as described in detail in  
867 Jeffris et al., 2007. The signal channel containing the GFP expression pattern was then transformed using  
868 the warped mesh determined above, the two individual image files were then combined as separate  
869 channels and converted back to the LSM file format.

870

### 871 **Analysis**

872 We performed hierarchical clustering based on the neurite innervation of DNs in the brain (Figure 8) and  
873 VNC (Figure 7) using the MATLAB statistics toolbox with Pearson's correlation as metric and average  
874 linkage for calculating distances. DN innervation was represented as a matrix, where the presence and  
875 absence of innervation were scored as '1' and '0' (Supplementary Table 1). We only scored smooth  
876 processes as '1' for DN innervation in the brain. To evaluate the pattern of DN axonal projections in the  
877 VNC, we calculated Pearson's linear correlation coefficient between each pair of VNC regions (Figure  
878 7B). To evaluate the pattern of DN axonal projections in the brain, we calculated Pearson's linear  
879 correlation coefficient between each pair of brain regions and sorted by the results of the clustering  
880 analysis (Figure 8B). The brain regions without DN innervation were omitted.

881

882 For the visualization of spatial patterns of DN distribution (Figures 6 and 9), we made pseudo-color maps  
883 for the brain and VNC neuropil compartments. The number of DN types visiting each compartment was  
884 counted and mapped onto the neuropil segmentation data with pseudo-color. We only counted the  
885 innervation with smooth appearance in Figures 6A, *top*, and 9A, and the innervation with varicose  
886 appearance in Figure 6A, *bottom*, and 9B.

887

888 For the analysis of neurite distribution in the protoerebrum (Figure 15), registered brain data were used to  
889 compare the dendritic distribution of DNs in the protocerebrum (Peng et al., 2011). Using segmentation  
890 data, we counted the number of voxels for neurite volume along the anterior-posterior axis with 1- $\mu$ m  
891 interval. We excluded the volume of somata and axons. The value at each depth was normalized by the  
892 maximum value for each DN.

893

894 **SUPPLEMENTAL INFORMATION**

895

896 Supplemental Information includes 24 figures and 4 tables and can be found with this article online.

897

898

899 **ACKNOWLEDGMENTS**

900

901 We are grateful to Gerald Rubin and Barry Dickson for providing GAL4 lines, Barrett Pfeiffer and Gerry  
902 Rubin for constructs used to make the PA-GFP reagent, Julie Simpson, Heather Dionne and Teri Ngo for  
903 genetic reagents, Rob Court for initial help setting up the VNC aligner at Janelia and Hideo Otsuna for  
904 optimization of the VNC aligner and processing of VNC data, Jana Boerner for segmentation data of  
905 VNC bundles. The Janelia Fly facility (Amanda Cavallaro, Todd Laverty, Karen Hibbard, Jui-Chun Kao  
906 and others) helped in fly husbandry, and the FlyLight Project Team (Rebecca Johnston, Oz Malkesman,  
907 Nirmala Iyer, Kevin Zeng, Kelley Salvesen, Nick Abel, Phuson Hulamm, Reeham Motaher, Susana Tae,  
908 Rebecca Vorimo) performed brain dissections, histological preparations, and confocal imaging. We also  
909 thank Kei Ito and Masayoshi Ito for sharing information on clonal units, Jens Goldammer and Masayoshi  
910 Ito for comments on an early version of the manuscript, and Jim Truman and David Shepherd for helpful  
911 discussions on VNC anatomy. We are grateful to the FlyCircuit database from the NCHC (National  
912 Center for High-performance Computing) and NTHU (National Tsing Hua University), and to the  
913 FLYBRAIN neuron database in the University of Tokyo.

914 **REFERENCES**

915

916 Altman JS, Kien J (1979) Suboesophageal neurons involved in head movements and feeding in locusts.  
917 Proc Roy Soc Lond B 205:209-227.

918 Aptekar JW, Keleş MF, Lu PM, Zolotova NM, Frye MA (2015) Neurons Forming Optic Glomeruli  
919 Compute Figure–Ground Discriminations in *Drosophila*. *J Neurosci* 35:7587-7599.

920 Aso Y, Hattori D, Yu Y, Johnston RM, Iyer NA, Ngo TTB, Dionne H, Abbott LF, Axel R, Tanimoto H,  
921 Rubin GM (2014) The neuronal architecture of the mushroom body provides a logic for associative  
922 learning. *eLIFE* 3:e04577.

923 Bacon JP, Strausfeld NJ (1986) The dipteran ‘Giant fibre’ pathway: neurons and signals. *J Comp Physiol*  
924 A 158:529-548.

925 Balint CN, Dickinson MH (2001) The correlation between wing kinematics and steering muscle activity  
926 in the blowfly *Calliphora vicina*. *J Exp Biol* 204:4213-4226.

927 Bidaye SS, Machacek C, Wu Y, Dickson BJ (2014) Neuronal control of *Drosophila* walking direction.

928 Science 344:97-101. Blagburn JM, Alexopoulos H, Davies JA, Bacon JP (1999). Null Mutation in  
929 shaking-B Eliminates Electrical, but not Chemical, Synapses in the *Drosophila* Giant Fiber  
930 System: A Structural Study. *J Comp Neurol* 404:449-458.

931 Borgmann A, Büschges A (2015) Insect motor control: methodological advances, descending control and  
932 inter-leg coordination on the move. *Curr Opin Neurobiol* 33:8-15.

933 Boerner J, Duch C (2010) Average shape standard atlas for adult *Drosophila* ventral nerve cord. *J Comp*  
934 *Neurol* 518:2437-2455.

935 Borst A, Hagg J, Reiff DF (2010) Fly motion vision. *Annu Rev Neurosci* 33:49-70.

936 Breidbach O (1990) Constant topological organization of the coleopteran metamorphosing nervous  
937 system: analysis of persistent elements in the nervous system of *Tenebrio molitor*. *Dev Neurobiol*  
938 21:990-1001.

939 Brierley DJ, Rathore K, VijayRaghavan K, Williams DW (2012) Developmental origins and architecture  
940 of *Drosophila* leg motorneurons. *J Comp Neurol* 520:1629-1649.

941 Brocard F, Dubuc R (2003) Differential contribution of reticulospinal cells to the control of locomotion  
942 induced by the mesencephalic locomotor region. *J Neurophysiol* 90:1714-1727.

943 Bullock T, Horridge GA (1965) Structure and function in the nervous systems of invertebrates. San  
944 Francisco, London

945 Burrows M (1996) The Neurobiology of an Insect Brain. Oxford University Press.

- 946 Busch S, Selcho M, Ito K, Tanimoto H (2009) A map of octopaminergic neurons in the *Drosophila*  
947 brain. *J Comp Neurol* 513:643-667.
- 948 Bässler U, Roth E, Breutel G (1985) The inherent walking direction differs for the prothoracic and  
949 metathoracic legs of stick insects. *J Exp Biol* 116:301-311.
- 950 Card GM (2012) Escape behaviors in insects. *Curr Opin Neurobiol* 22:180-186.
- 951 Card G, Dickinson M (2008) Performance trade-offs in the flight initiation of *Drosophila*. *J Exp*  
952 *Biol* 211:341-353.
- 953 Card G, Dickinson MH (2008) Visually mediated motor planning in the escape response of *Drosophila*.  
954 *Curr Biol* 18:1300-1307.
- 955 Cardona A, Larsen C, Hartenstein V (2009) Neuronal fiber tracts connecting the brain and ventral nerve  
956 cord of the early *Drosophila* Larva. *J Comp Neurol* 515:427-440.
- 957 Cardona A, Saalfeld S, Preibisch S, Schmid B, Cheng A, Pulokas J, Tomacak P, Hartenstein V (2010) An  
958 integrated micro- and macroarchitectural analysis of the *Drosophila* brain by computer-assisted  
959 serial section electron microscopy. *PLoS Biol* 8:e1000502.
- 960 Chan WP, Dickinson MH (1996) Position-specific central projections of mechanosensory neurons on the  
961 haltere of the blow fly, *Calliphora vicina*. *J Comp Neurol* 369:405-418.
- 962 Chiang AS, Lin CY, Chuang CC, Chang HM, Hsieh CH, Yeh CW, Shih CT, Wu JJ, Wang GT, Chen YC,  
963 Wu CC, Chen GY, Ching YT, Lee PC, Lin CY, Lin HH, Wu CC, Hsu HW, Huang YA, Chen JY,  
964 Chiang HJ, Lu CF, Ni RF, Yeh CY, Hwang JK (2011) Three dimensional reconstruction of brain-  
965 wide wiring networks in *Drosophila* at single-cell resolution. *Curr. Biol.* 21, 1–11.
- 966 Cogshall JC, Boschek CB, Buchner SM (1973) Preliminary investigations on a pair of giant fibres in the  
967 central nervous system of dipteran flies. *Zeitschrift für Naturforschung* 28:783–4.
- 968 Costa M, Manton JD, Ostrovsky AD, Prohaska S, Jefferis GS (2016) NBLAST: Rapid, sensitive  
969 comparison of neuronal structure and construction of neuron family databases. *Neuron* 91:293-311.
- 970 Court R, Armstrong D, Borner J, Card G, Costa M, Dickinson MH, Duch C, Korff W, Mann R, Merritt D,  
971 Murphey R, Namiki S, Seeds A, Shepherd D, Shirangi T, Simpson J, Tuthill J, Truman J, Williams  
972 D. (2017) A systematic nomenclature for the *Drosophila* ventral nervous system. bioRxiv doi:  
973 <https://doi.org/10.1101/122952>
- 974 Dickinson MH, Tu MS (1997) The function of dipteran flight muscle. *Comp Biochem Physiol A*  
975 116:223-238.
- 976 Dow MA, von Schilcher, F (1975). Aggression and mating success in *Drosophila melanogaster*. *Nature*  
977 254:511-512.

- 978 Drew T, Prentice S, Schepens B (2004) Cortical and brainstem control of locomotion. *Prog Brain Res*  
979 143:251-261.
- 980 Dudley, R. (1994). *The biomechanics of insect flight: Form, function, evolution*. Princeton University  
981 Press.
- 982 Egelhaaf M, Boeddeker N, Kern R, Kurtz R, Lindemann JP (2012) Spatial vision in insects is facilitated  
983 by shaping the dynamics of visual input through behavioral action. *Front Neural Circuits* 6:108.
- 984 Erickson RP (1968) Stimulus coding in topographic and non-topographic afferent modalities: on the  
985 significance of the activity of individual sensory neurons. *Psychol Rev* 75:447-465.
- 986 Esposito MS, Capelli P, Arber S (2014) Brainstem nucleus MdV mediates skilled forelimb motor tasks.  
987 *Nature* 508:351-356.
- 988 Ewing AW (1979) The role of feedback during singing and flight in *Drosophila melanogaster*. *Physiol*  
989 *Entomol* 4:329-337.
- 990 Fayyazuddin A, Dickinson MH (1996) Haltere afferents provide direct, electrotonic input to a steering  
991 motor neuron in the blowfly, *Calliphora*. *J Neurosci* 16:5225-5232.
- 992 Fotowat H, Fayyazuddin A, Bellen HJ, Gabbiani F (2009) A novel neuronal pathway for visually guided  
993 escape in *Drosophila melanogaster*. *J Neurophysiol* 102:875-885.
- 994 Gal R, Libersat F (2006) New vistas on the initiation and maintenance of insect motor behaviors revealed  
995 by specific lesions of the head ganglia. *J Comp Physiol A* 192:1003-1020.
- 996 Gatesy SM, Dial KP (1996) Locomotor modules and the evolution of avian flight. *Evolution*, 331-340.
- 997 Gonzalez-Bellido PT, Peng H, Yang J, Georgopoulos AP, Olberg RM (2013) Eight pairs of descending  
998 visual neurons in the dragonfly give wing motor centers accurate population vector of prey  
999 direction. *Proc Natl Acad Sci USA* 110:696-701.
- 1000 Graham D (1979a) Effects of circum-oesophageal lesion on the behaviour of the stick insect *Carausius*  
1001 *morosus*. I. Cyclic behaviour patterns. *Biol Cybern* 32:139-145.
- 1002 Graham D (1979b) Effects of circum-oesophageal lesion on the behaviour of the stick insect *Carausius*  
1003 *morosus*. II. Changes in walking co-ordination. *Biol Cybern* 32:139-145.
- 1004 Graham D, Epstein S (1985) Behavior and motor output for an insect walking on a slippery surface. *J Exp*  
1005 *Biol* 118:287-297.
- 1006 Gronenberg W, Milde JJ, Strausfeld NJ (1995) Oculomotor control in calliphorid flies: Organization of  
1007 descending neurons to neck motor neurons responding to visual stimuli. *J Comp Neurol* 361:267-  
1008 284.
- 1009 Gronenberg W, Strausfeld NJ (1990) Descending neurons supplying the neck and flight motor of Diptera:  
1010 Physiological and anatomical characteristics. *J Comp Neurol* 302:973-991.



- 1011 Gross GH, Oppenheim RW (1985) Novel sources of descending input to the spinal cord of the hatchling  
1012 chick. *J Comp Neurol* 232:162-179.
- 1013 Haikala V, Joesch M, Borst A, Mauss AS (2013). Optogenetic control of fly optomotor responses. *J*  
1014 *Neurosci* 33:13927-13934.
- 1015 Hammond S, O’Shea M (2007) Escape flight initiation in the fly. *Journal of Comparative Physiology A*,  
1016 193:471-476.
- 1017 Hedwig B (1994) A cephalothoracic command system controls stridulation in the acridid grasshopper  
1018 *Omocestus viridulus* L. *J Neurophysiol* 72:2015-2025.
- 1019 Hedwig B (1986) On the role in stridulation of plurisegmental interneurons of the acridid grasshopper  
1020 *Omocestus viridulus* L. *J Comp Physiol A* 158:429-444.
- 1021 Heffner R, Masterton, RB (1975) Variation in Form of the Pyramidal Tract and Its Relationship to Digital  
1022 Dexterity; pp. 188–200. *Brain Behav Evol* 12:188-200.
- 1023 Heffner RS, Masterton RB (1983) The role of the corticospinal tract in the evolution of human digital  
1024 dexterity. *Brain Behav Ecol* 23:165-183.
- 1025 Heide G, Götz KG (1996) Optomotor control of course and altitude in *Drosophila melanogaster* is  
1026 correlated with distinct activities of at least three pairs of flight steering muscles. *J Exp Biol*  
1027 199:1711 -1726.
- 1028 Heinrich R (2002) Impact of descending brain neurons on the control of stridulation, walking, and flight  
1029 in orthoptera. *Microsc Res Tech* 56:292-301.
- 1030 Heinze S, Florman J, Asokaraj S, El Jundi B, Reppert SM (2013) Anatomical basis of sun compass  
1031 navigation II: the neuronal composition of the central complex of the monarch butterfly. *J Comp*  
1032 *Neurol* 521:267-298.
- 1033 Heisenberg M (2003) Mushroom body memoir: from maps to models. *Nat Rev Neurosci* 4:266-275.
- 1034 Homberg U (1994) Flight-correlated activity changes in neurons of the lateral accessory lobes in brain of  
1035 the locust *Schistocerca gregaria*. *J Comp Physiol A* 175:597-610.
- 1036 Hsu CT, Bhandawat V (2016) Organization of descending neurons in *Drosophila melanogaster*. *Sci Rep*  
1037 6:20259.
- 1038 Huston SJ, Krapp HG (2008) Visuomotor transformation in the fly gaze stabilization system. *PLoS Biol*  
1039 6:e173.
- 1040 Ito K, Shinomiya K, Armstrong D, Boyan G, Hartenstein V, Harzsch S, Heisenberg M, Homberg U,  
1041 Jenett A, Keshishian H, Restifo L, Rössler W, Simpson J, Strausfeld NJ, Strauss R, Vosshall LB  
1042 (2014) A coordinated nomenclature system for the insect brain: Detailed definition of the neuropil  
1043 boundaries. *Neuron* 81:755-765.

- 1044 Ito K, Suzuki K, Estes P, Ramaswami M, Yamamoto D, Strausfeld NJ (1998) The organization of extrinsic  
1045 neurons and their implications in the functional roles of the mushroom bodies in *Drosophila*  
1046 *melanogaster* Meigen. *Learn Memory* 5:52-77.
- 1047 Ito M, Masuda N, Shinomiya K, Endo K, Ito K (2013) Systematic analysis of neural projections reveals  
1048 clonal composition of the *Drosophila* brain. *Curr Biol* 23:644-655.
- 1049 Jefferis GS, Potter CJ, Chan AM, Marin EC, Rohlfsing T, Maurer CR, Luo L (2007) Comprehensive maps  
1050 of *Drosophila* higher olfactory centers: spatially segregated fruit and pheromone representation.  
1051 *Cell* 128:1187-1203.
- 1052 Jenett A, Rubin GM, Ngo T-TB, Shepherd D, Murphy C, Dionne H, Pfeiffer BD, Cavallaro A, Hall D,  
1053 Jeter J, et al. (2012) A GAL4-driver line resource for *Drosophila* neurobiology. *Cell Reports*  
1054 2:991–1001.
- 1055 Johnston RM, Consoulas C, Pflüger H, Levine RB (1999) Patterned activation of unpaired median  
1056 neurons during fictive crawling in *Manduca sexta* larvae. *J Exp Biol* 202:103-113.
- 1057 Johnson SE, Murphey RK (1985) The afferent projection of mesothoracic bristle hairs in the cricket,  
1058 *Acheta domesticus*. *J Comp Physiol A* 156:369-379.
- 1059 Kanzaki R, Ikeda A, Shibuya T (1994) Morphological and physiological properties of pheromone-  
1060 triggered flipflopping descending interneurons of the male silkworm moth, *Bombyx mori*. *J Comp*  
1061 *Physiol A* 175:1-14.
- 1062 Kien J (1983) The initiation and maintenance of walking in the locust: an alternative to the command  
1063 concept. *Proc Roy Soc Lond B* 219:137-174.
- 1064 Kien J (1990a) Neuronal activity during spontaneous walking—I. Starting and stopping. *Comp Biochem*  
1065 *Physiol A* 95:607-621.
- 1066 Kien J (1990b) Neuronal activity during spontaneous walking—II. Correlation with stepping. *Comp*  
1067 *Biochem Physiol A* 95:623-638.
- 1068 Kien J, Altman JS (1984) Descending interneurons from the brain and suboesophageal ganglia and their  
1069 role in the control of locust behavior. *J Insect Physiol.* 30:59-72.
- 1070 Kien J, Altman JS (1992) Preparation and execution of movement: parallels between insect and  
1071 mammalian motor systems. *Com Biochem Physiol Comp Physiol* 103:15-24.
- 1072 Kien J, Williams M (1983) Morphology of neurons in locust brain and suboesophageal ganglion involved  
1073 in initiation and maintenance of walking. *Proc Roy Soc Lond B* 219:175-192.
- 1074 Kim, AJ, Fenk LM, Lyu C, Maimon G (2017) Quantitative Predictions Orchestrate Visual Signaling in  
1075 *Drosophila*. *Cell* 168:280-294.

- 1076 Kim AJ, Fitzgerald JK, Maimon G (2015) Cellular evidence for efference copy in *Drosophila* visuomotor  
1077 processing. *Nat Neurosci* 18:1247–1255.
- 1078 Kimmel CB, Metcalfe WK, Schabtach E (1985) T reticular interneurons: a class of serially repeating cells  
1079 in the zebrafish hindbrain. *J Comp Neurol* 233:365-376.
- 1080 King DG, Wyman RJ (1980) Anatomy of the giant fibre pathway in *Drosophila*. I. Three thoracic  
1081 components of the pathway. *J Neurocytol* 9:753-770.
- 1082 Klapoetke NC, Nern A, Peek MY, Rogers EM, Breads P, Rubin GM, Reiser MB, Card GM (2017) Ultra-  
1083 selective looming detection from radial motion opponency. *Nature* 551:237-241.
- 1084 Kohatsu S, Koganezawa M, Yamamoto D (2011) Female contact activates male-specific interneurons that  
1085 trigger stereotypic courtship behavior in *Drosophila*. *Neuron* 69:498-508.
- 1086 Koto M, Tanouye M, Ferrus A, Thomas J, Wyman RJ (1981) The morphology of the cervical giant fiber  
1087 neuron of *Drosophila*. *Brain Res* 221:213–217. nt motoneuron of *Drosophila melanogaster*. *J Comp*  
1088 *Physiol A* 87:213–235.
- 1089 Krapp HG, Hengstenberg B, Hengstenberg R (1998) Dendritic structure and receptive-field organization  
1090 of optic flow processing interneurons in the fly. *J Neurophysiol* 79:1902-1917.
- 1091 Kukalova-Peck, J (1978) Origin and evolution of insect wings and their relation to metamorphosis, as  
1092 documented by the fossil record. *J Morphol* 156:53-125.
- 1093 Kupfermann I, Weiss KR (1978) The command neuron concept. *Behav Brain Sci* 1:3–39.
- 1094 Landgraf M, Jeffrey V, Fujioka M, Jaynes JB, Bate M (2003) Embryonic origins of a motor system:  
1095 motor dendrites form a myotopic map in *Drosophila*. *PLoS Biol* 1:e41.
- 1096 Leise EM (1991) Evolutionary trends in invertebrate ganglionic structure. *Seminars in Neuroscience*  
1097 3:369-377.
- 1098 Lehmann, F. O., & Bartussek, J. (2017). Neural control and precision of flight muscle activation in  
1099 *Drosophila*. *J Comp Physiol A*, 203:1-14.
- 1100 Lemon RN (2008) Descending pathways in motor control. *Annu Rev Neurosci* 31:195-218.
- 1101 Levine J, Tracey D (1973) Structure and function of the giant motoneuron of *Drosophila melanogaster*. *J*  
1102 *Comp Physiol A* 87:213–235.
- 1103 Liang H, Paxinos G, Watson C (2012) Projections from the brain to the spinal cord in the mouse. *Brain*  
1104 *Struct Funct* 215:159-186.
- 1105 Lin CY, Chuang CC, Hua TE, Chen CC, Dickson BJ, Greenspan RJ, Chiang AS (2013) A comprehensive  
1106 wiring diagram of the protocerebral bridge for visual information processing in the *Drosophila*  
1107 brain. *Cell Rep* 3:1739-1753.

- 1108 Lindsay T, Sustar A, Dickinson M (2017) The function and organization of the motor system controlling  
1109 flight maneuvers in flies. *Curr Biol* 27:345-358.
- 1110 Lins F, Elsner N (1995) Descending stridulatory interneurons in the suboesophageal ganglion of two  
1111 grasshopper species. *J Comp Physiol A* 176:809-821.
- 1112 Luan H, Peabody NC, Vinson CR, White BH (2006) Refined spatial manipulation of neuronal function  
1113 by combinatorial restriction of transgene expression. *Neuron* 52:425-436.
- 1114 Merritt DJ, Murphey RK (1992) Projections of leg proprioceptors within the CNS of the fly *Phormia* in  
1115 relation to the generalized insect ganglion. *J Comp Neurol* 322:16-34.
- 1116 Metcalfe WK, Mendelson B, Kimmel CB (1986) Segmental homologies among reticulospinal neurons in  
1117 the hindbrain of the zebrafish larva. *J Comp Neurol* 251:147-159.
- 1118 Milde, J. J., Seyan, H. S., & Strausfeld, N. J. (1987). The neck motor system of the fly *Calliphora*  
1119 *erythrocephala*. II. Sensory organization. *J Comp Physiol A Neuroethol Sens Neural Behav*  
1120 *Physiol*, 160: 225-238.
- 1121 Milde JJ, Strausfeld NJ (1990) Cluster organization and response characteristics of the giant fiber  
1122 pathway of the blowfly *Calliphora erythrocephala*. *J Comp Neurol* 294:59-75.
- 1123 Mishima T, Kanzaki R (1999) Physiological and morphological characterization of olfactory descending  
1124 interneurons of the male silkworm moth, *Bombyx mori*. *J Comp Physiol A* 184:143-160.
- 1125 Muijres FT, Elzinga MJ, Melis JM, Dickinson MH (2014) Flies evade looming targets by executing rapid  
1126 visually directed banked turns. *Science* 344:172-177.
- 1127 Nolen TG, Hoy RR (1984) Initiation of behavior by single neurons: the role of behavioral context.  
1128 *Science* 226:992-994.
- 1129 Mu L, Bacon JP, Ito K, Strausfeld NJ (2014) Responses of *Drosophila* giant descending neurons to visual  
1130 and mechanical stimuli. *J Exp Biol* 217: 2121-2129.
- 1131 Murphey RK, Possidente DR, Vandervorst P, Ghysen A (1989) Compartments and the topography of leg  
1132 afferent projections in *Drosophila*. *J Neurosci* 9:3209-3217.
- 1133 Namiki S, Iwabuchi S, Kono PP, Kanzaki R (2014) Information flow through neural circuits for  
1134 pheromone orientation. *Nat Commun* 5:5919.
- 1135 Namiki S, Kanzaki R (2016) Comparative neuroanatomy of the lateral accessory lobe in the insect brain.  
1136 *Front Physiol* 7:244.
- 1137 Nern A, Pfeiffer BD, Rubin GM (2015) Optimized tools for multicolor stochastic labeling reveal diverse  
1138 stereotyped cell arrangements in the fly visual system. *Proc Natl Acad Sci USA* 112:E2967-E2976.
- 1139 Niven, J. E., Graham, C. M., & Burrows, M. (2008). Diversity and evolution of the insect ventral nerve  
1140 cord. *Annu Rev Entomol* 53, 253-271.

- 1141 Nüssel DR, Hogmo O, Hallberg E (1984) Antennal receptors in the blowfly *Calliphora erythrocephala*. I.  
1142 The gigantic central projection of the pedicellar campaniform sensillum. *J Morphol* 180:159-169.
- 1143 Okada R, Sakura M, Mizunami M (2003) Distribution of dendrites of descending neurons and its  
1144 implications for the basic organization of the cockroach brain. *J Comp Neurol* 458:158-174.
- 1145 O'Shea M, Rowell CHF, Williams JLD (1974). The anatomy of a locust visual interneurone; the  
1146 descending contralateral movement detector. *J Exp Biol* 60: 1-12.
- 1147 Otsuna H, Ito K (2006) Systematic analysis of the visual projection neurons of *Drosophila melanogaster*.  
1148 I. Lobula-specific pathways. *J Comp Neurol* 497:928-958.
- 1149 Otto D, Hennig RM (1993) Interneurons descending from the cricket subesophageal ganglion control  
1150 stridulation and ventilation. *Naturwissenschaften* 80:36-38.
- 1151 Otto D, Janiszewski J (1989) Interneurones originating in the suboesophageal ganglion that control  
1152 ventilation in two cricket species: effects of the interneurones (SD-AE neurones) on the motor  
1153 output. *J Insect Physiol* 35:483-491.
- 1154 Panser K, Tirian L, Schulze F, Villalba S, Jefferis GS, Buehler K, Straw AD (2016) Automatic  
1155 segmentation of *Drosophila* neural compartments using GAL4 expression data reveals novel visual  
1156 pathways. *Curr Biol* 26:1943-1954.
- 1157 Patterson GH, Lippincott-Schwartz J (2002) A photoactivatable GFP for selective photobreaking of  
1158 proteins and cells. *Science* 297:1873-1877.
- 1159 Peng H, Chung P, Long F, Qu L, Jenett A, Seeds AM, Myers EW, Simpson JH (2011) BrainAligner: 3D  
1160 registration atlases of *Drosophila* brains. *Nat Methods*, 8:493-498.
- 1161 Pereanu W, Hartenstein V (2006) Neural lineages of the *Drosophila* brain: a three-dimensional digital  
1162 atlas of the pattern of lineage location and projection at the late larval stage. *J Neurosci* 26:5534-  
1163 5553.
- 1164 Peters BH, Römer H, Marquart V (1986) Spatial segregation of synaptic inputs and outputs in a locust  
1165 auditory interneurone. *J Comp Neurol* 254:34-50
- 1166 Pfeiffer BD, Jenett A, Hammonds AS, Ngo T-TB, Misra S, Murphy C, Scully A, Carlson JW, Wan KH,  
1167 Lavery TR, Mungall C, Svirskas R, Kadonaga JT, Doe CQ, Eisen MB, Celniker SE, Rubin GM  
1168 (2008) Tools for neuroanatomy and neurogenetics in *Drosophila*. *Proc Natl Acad Sci USA*  
1169 105:9715–9720
- 1170 Pfeiffer BD, Ngo TTB, Hibbard KL, Murphy C, Jenett A, Truman JW, Rubin GM (2010) Refinement of  
1171 tools for targeted gene expression in *Drosophila*. *Genetics* 186:735-755.
- 1172 Pfeiffer BD, Truman JW, Rubin GM (2012) Using translational enhancers to increase transgene  
1173 expression in *Drosophila*. *Proc Natl Acad Sci USA* 109:6626-6631.

- 1174 Power ME (1948) The thoracico-abdominal nervous system of an adult insect, *Drosophila*  
1175 *melanogaster*. J Comp Neurol 88:347-409.
- 1176 Prokop J, Pecharová M, Nel A, Hörschemeyer T, Krzemińska E, Krzemiński W, Engel MS (2017)  
1177 Paleozoic nymphal wing pads support dual model of insect wing origins. Curr Biol 27:263-269.
- 1178 Ramirez JM (1998) Interneurons in the suboesophageal ganglion of the locust associated with flight  
1179 initiation. J Comp Physiol A 162:669-685.
- 1180 Roeder KD (1937) The control of tonus and locomotor activity in the praying mantis (*Mantis religiosa* L.).  
1181 J Exp Zool 76:353-374.
- 1182 Rohlfsing T, Maurer CR (2003) Nonrigid image registration in shared-memory multiprocessor  
1183 environments with application to brains, breasts, and bees. IEEE transactions on information  
1184 technology in biomedicine 7:16-25.
- 1185 Rosenbaum P, Wosnitza A, Büschges A, Gruhn M (2010) Activity patterns and timing of muscle activity  
1186 in the forward walking and backward walking stick insect *Carausius morosus*. J Neurophysiol  
1187 104:1681-1695.
- 1188 Rubinstein CD, Rivlin PK, Hoy RR (2010) Genetic feminization of the thoracic nervous system disrupts  
1189 courtship song in male *Drosophila melanogaster*. J Neurogenet 24:234-245.
- 1190 Ryan JM, Cushman J, Jordan B, Samuels A, Frazer H, Baier C (1998) Topographic position of forelimb  
1191 motoneuron pools is conserved in vertebrate evolution. Brain Behav Evol 51:90-99.
- 1192 Röder L, Vola C, Kerridge S (1992) The role of the teashirt gene in trunk segmental identity in  
1193 *Drosophila*. Development 115:1017-1033.
- 1194 Römer H, Marquart V (1984). Morphology and physiology of auditory interneurons in the metathoracic  
1195 ganglion of the locust. J Comp Physiol A 155:249-262.
- 1196 Sandeman DC, Markl H (1980) Head movements in flies (*Calliphora*) produced by deflexion of the  
1197 halteres. J Exp Biol 85:43-60.
- 1198 Schnell B, Ros IG, Dickinson MH (2017) A descending neuron correlated with the rapid steering  
1199 maneuvers of flying *Drosophila*. Curr Biol 8:1200–1205.
- 1200 Seki, R., Li, C., Fang, Q., Hayashi, S., Egawa, S., Hu, J., ... & Matsubara, H. (2017). Functional roles of  
1201 Aves class-specific cis-regulatory elements on macroevolution of bird-specific features. Nat  
1202 Commun 8:14229.
- 1203 Sen R, Wu M, Branson K, Robie A, Rubin GM, Dickson BJ (2017). Moonwalker descending neurons  
1204 mediate visually evoked retreat in *Drosophila*. Curr Biol 27:766-771.

- 1205 Severina IY, Isavnina IL, Knyazev AN (2016) Topographic anatomy of ascending and descending  
1206 neurons of the supraesophageal, meso-and metathoracic ganglia in paleo-and neopterous insects. J  
1207 Evol Biochem Physiol 52:397-406.
- 1208 Shepherd D, Harris R, Williams DW, Truman JW (2016) Postembryonic lineages of the *Drosophila*  
1209 ventral nervous system: Neuroglial expression reveals the adult hemilineage associated fiber tracts  
1210 in the adult thoracic neuromeres. J Comp Neurol 524:2677-2695.
- 1211 Shiga S, Toyoda I, Numata H (2000) Neurons projecting to the retrocerebral complex of the adult blow  
1212 fly, *Protophormia terraenovae*. Cell Tissue Res 299:427-439.
- 1213 Shih CT, Sporns O, Yuan SL, Su TS, Lin YJ, Chuang CC, Wang TY, Lo CC, Greenspan RJ, Chiang AS  
1214 (2015) Connectomics-based analysis of information flow in the *Drosophila* brain. Curr Biol 25:1-  
1215 10.
- 1216 Simpson JH (2016). Rationally subdividing the fly nervous system with versatile expression reagents. J  
1217 Neurogenet, 30:185-194.
- 1218 Skinner K (1985) The structure of the fourth abdominal ganglion of the crayfish, *Procambarus clarki*  
1219 (Girard). I. Tracts in the ganglionic core. J Comp Neurol 234:168-181.
- 1220 Staudacher E (1998) Distribution and morphology of descending brain neurons in the cricket *Gryllus*  
1221 *bimaculatus*. Cell Tissue Res 294:187-202.
- 1222 Stone T, Webb B, Adden A, Weddig NB, Honkanen A, Templin R, Weislo W, Scimeca L, Warrant E,  
1223 Heinze, S. (2017) An anatomically constrained model for path integration in the bee brain. Curr Biol  
1224 27:3069-3085.
- 1225 Strausfeld NJ (1976) Atlas of an insect brain. Springer-Verlag
- 1226 Strausfeld NJ (2012) Arthropod brains. Evolution, functional elegance, and historical significance.  
1227 Harvard University Press.
- 1228 Strausfeld, NJ, Bassemir UK (1983) Cobalt-coupled neurons of a giant fibre system in Diptera. J  
1229 Neurocytol 12:971-991.
- 1230 Strausfeld NJ, Bassemir U, Singh RN, Bacon JP (1984) Organizational principles of outputs from  
1231 dipteran brains. J Insect Physiol 30:73-93.
- 1232 Strausfeld NJ, Gronenberg W (1990) Descending neurons supplying the neck and flight motor of Diptera:  
1233 organization and neuroanatomical relationships with visual pathways. J Comp Neurol 302:954-972.
- 1234 Strausfeld NJ, Hirth F (2013) Deep homology of arthropod central complex and vertebrate basal ganglia.  
1235 Science 340:157-161.
- 1236 Strausfeld NJ, Lee JK (1991) Neuronal basis for parallel visual processing in the fly. Visual Neurosci 7:  
1237 13-33.

- 1238 Strausfeld NJ, Seyan HS (1985) Convergence of visual, haltere, and prosternal inputs at neck motor  
1239 neurons of *Calliphora erythrocephala*. *Cell Tissue Res* 240:601-615.
- 1240 Strausfeld NJ, Okamura JY (2007). Visual system of calliphorid flies: organization of optic glomeruli and  
1241 their lobula complex efferents. *J Comp Neurol* 500:166-188.
- 1242 Strausfeld, N. J., Seyan, H. S., & Milde, J. J. (1987). The neck motor system of the fly *Calliphora*  
1243 *erythrocephala*. I. Muscles and motor neurons. *J Comp Physiol A Neuroethol Sens Neural Behav*  
1244 *Physiol*, 160: 205-224.
- 1245 Strausfeld NJ, Sinakevitch I, Okamura JY (2007) Organization of local interneurons in optic glomeruli of  
1246 the dipterous visual system and comparisons with the antennal lobes. *Dev Neurobiol* 67:1267-1288.
- 1247 Suver MP, Huda A, Iwasaki N, Safarik S, Dickinson MH (2016) An Array of Descending Visual  
1248 Interneurons Encoding Self-Motion in *Drosophila*. *J Neurosci* 36:11768-11780.
- 1249 Szebenyi AL (1969) Cleaning behaviour in *Drosophila Melanogaster*. *Animal Behaviour* 17:641-651.  
1250 doi: 10.1016/S0003-3472(69)80006-0
- 1251 Thewissen JGM, Babcock SK (1991) Distinctive cranial and cervical innervation of wing muscles: new  
1252 evidence for bat monophyly. *Science* 251:934-937.
- 1253 Trimarchi, J. R., & Schneiderman, A. M. (1993). Giant fiber activation of an intrinsic muscle in the  
1254 mesothoracic leg of *Drosophila melanogaster*. *J Exp Biol* 177:149-167.
- 1255 Trimarchi JR, Schneiderman, AM (1995). Initiation of flight in the unrestrained fly, *Drosophila*  
1256 *melanogaster*. *J Zool* 235:211-222.
- 1257 Tu M, Dickinson M (1994) Modulation of negative work output from a steering muscle of the blowfly  
1258 *Calliphora vicina*. *J Exp Biol* 192:207-224.
- 1259 Tu MS, Dickinson MH (1996) The control of wing kinematics by two steering muscles of the blowfly  
1260 (*Calliphora vicina*). *J Comp Physiol A* 178:813-830.
- 1261 Tyrer NM, Gregory GE (1982) A guide to the neuroanatomy of locust suboesop1987al and thoracic  
1262 ganglia. *Philos Trans Roy Soc Lond B* 297:91-123.
- 1263 Usui-Ishihara A, Simpson P (2005) Differences in sensory projections between macro-and microchaetes  
1264 in *Drosophilid* flies. *Dev Biol* 277:170-183.
- 1265 Vonhoff F, Duch C (2010) Tiling among stereotyped dendritic branches in an identified *Drosophila*  
1266 motoneuron. *J Comp Neurol* 518:2169-2185.
- 1267 von Philipsborn AC, Liu T, Jai YY, Masser C, Bidaye SS, Dickson BJ (2011) Neuronal control of  
1268 *Drosophila* courtship song. *Neuron* 69:509-522.
- 1269 von Reyn CR, Breads P, Peek MY, Zheng GZ, Williamson WR, Yee AL, Leonardo A, Card GM (2014)  
1270 A spike-timing mechanism for action selection. *Nat Neurosci* 17:962-970.



- 1271 von Reyn CR, Nern A, Williamson WR, Breads P, Wu M, Namiki S & Card GM (2017) Feature  
1272 integration drives probabilistic behavior in the *Drosophila* escape response. *Neuron* 94:1190-1204.
- 1273 Wertz A, Borst A, Haag J (2008) Nonlinear integration of binocular optic flow by DNOVS2, a  
1274 descending neuron of the fly. *J Neurosci* 28:3131–40
- 1275 Wolff T, Iyer NA, Rubin GM (2015) Neuroarchitecture and neuroanatomy of the *Drosophila* central  
1276 complex: A GAL4-based dissection of protocerebral bridge neurons and circuits. *J Comp Neurol*  
1277 523:997-1037.
- 1278 Wu M, Nern A, Williamson WR, Morimoto MM, Reiser MB, Card GM, Rubin GM (2016) Visual  
1279 projection neurons in the *Drosophila* lobula link feature detection to distinct behavioral programs.  
1280 *eLife* 5:e21022.
- 1281 Wyman RJ, Thomas JB, Salkoff L, King DG (1984) The *Drosophila* giant fibre system. In: Eaton R (ed)  
1282 Neural mechanisms of startle behavior. Plenum, New York, pp 133-161
- 1283 Yu JY, Kanai MI, Demir E, Jefferis GS, Dickson BJ (2010) Cellular organization of the neural circuit that  
1284 drives *Drosophila* courtship behavior. *Curr Biol* 20:1602-1614.
- 1285 Yu HH, Awasaki T, Schroeder MD, Long F, Yang JS, He Y, Ding P, Kao JC, Wu GY, Peng H, Myers G,  
1286 Lee T. (2013) Clonal development and organization of the adult *Drosophila* central brain. *Curr*  
1287 *Biol* 23:633-643.

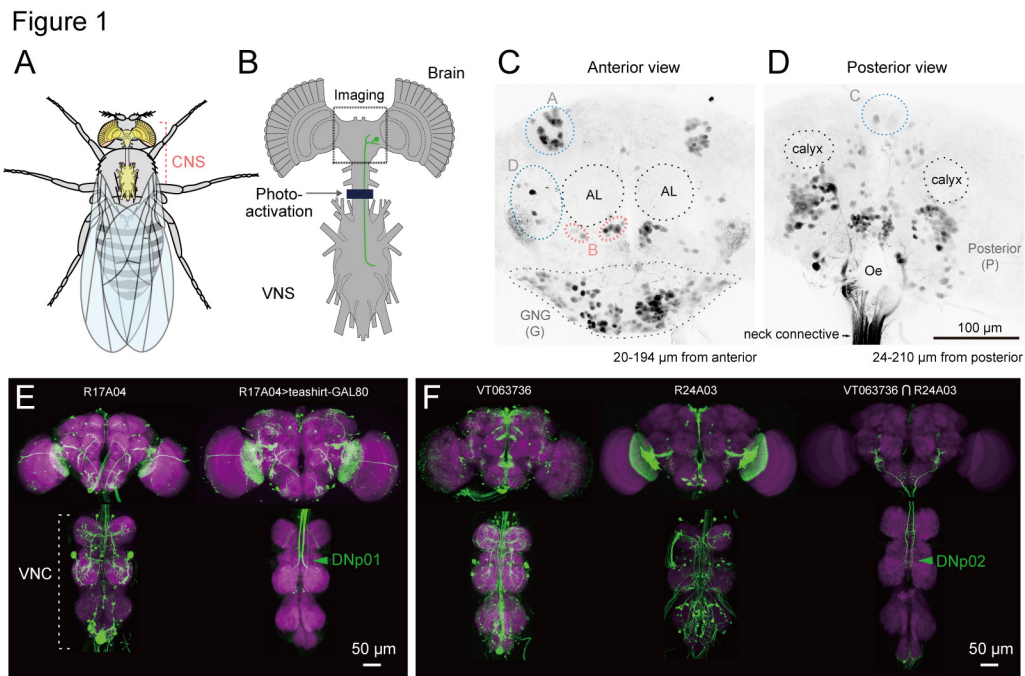

1288

1289 **Figure 1. Strategy for identifying descending neurons.**

1290 (A, B) The fly central nervous system includes the brain, located in the fly's head, and a ventral nerve  
1291 cord (VNC), located in the fly's thoracic cavity. These are connected by a population of descending  
1292 neurons (DNs, example in green), which have cell bodies in the brain. Arrow and dark line indicate area  
1293 of the neck connective illuminated to selectively label the populations of descending and ascending  
1294 neurons in a line pan-neuronally expressing photoactivatable GFP (PA-GFP). Dashed square indicates  
1295 field of view for imaging results in C, D.

1296 (C, D) Anterior and posterior views of PA-GFP-labeled DN cell bodies. Black dotted circles represent  
1297 location of identifiable brain neuropil structures, labeled bilaterally: antennal lobes (AL) and calyx. Blue,  
1298 light grey, and pink dotted lines enclose separate clusters of DN cell bodies labeled unilaterally: A  
1299 (anterior dorsal), B (anterior ventral), C (pars intercerebralis), D (outside anterior cluster), G (gnathal  
1300 ganglion, GNG, shown with dotted line). The uncircled cell bodies in (D) are all considered part of the  
1301 large posterior cluster (P).

1302 (E) Expression of VNC neurons is suppressed by expression of GAL80 under the *teashirt* promotor. This  
1303 operation facilitates analysis of DN axonal projection patterns.

1304 (F) Example of intersection method used to generate split-GAL4 drivers for DN. VT063736-GAL4 in  
1305 attP2 (left) and R24A03-GAL4 in attP2 (center) both show expression in DNp02, when crossed to  
1306 pJFRC2-10XUAS-IVS-mCD8::GFP in attP2. The enhancer fragments from these lines were used to  
1307 generate the fly line JRC-SS01053 carrying both VT063736-p65ADZp in attP40 and R24A03-  
1308 ZpGAL4DBD in attP2 (right).

Figure 2

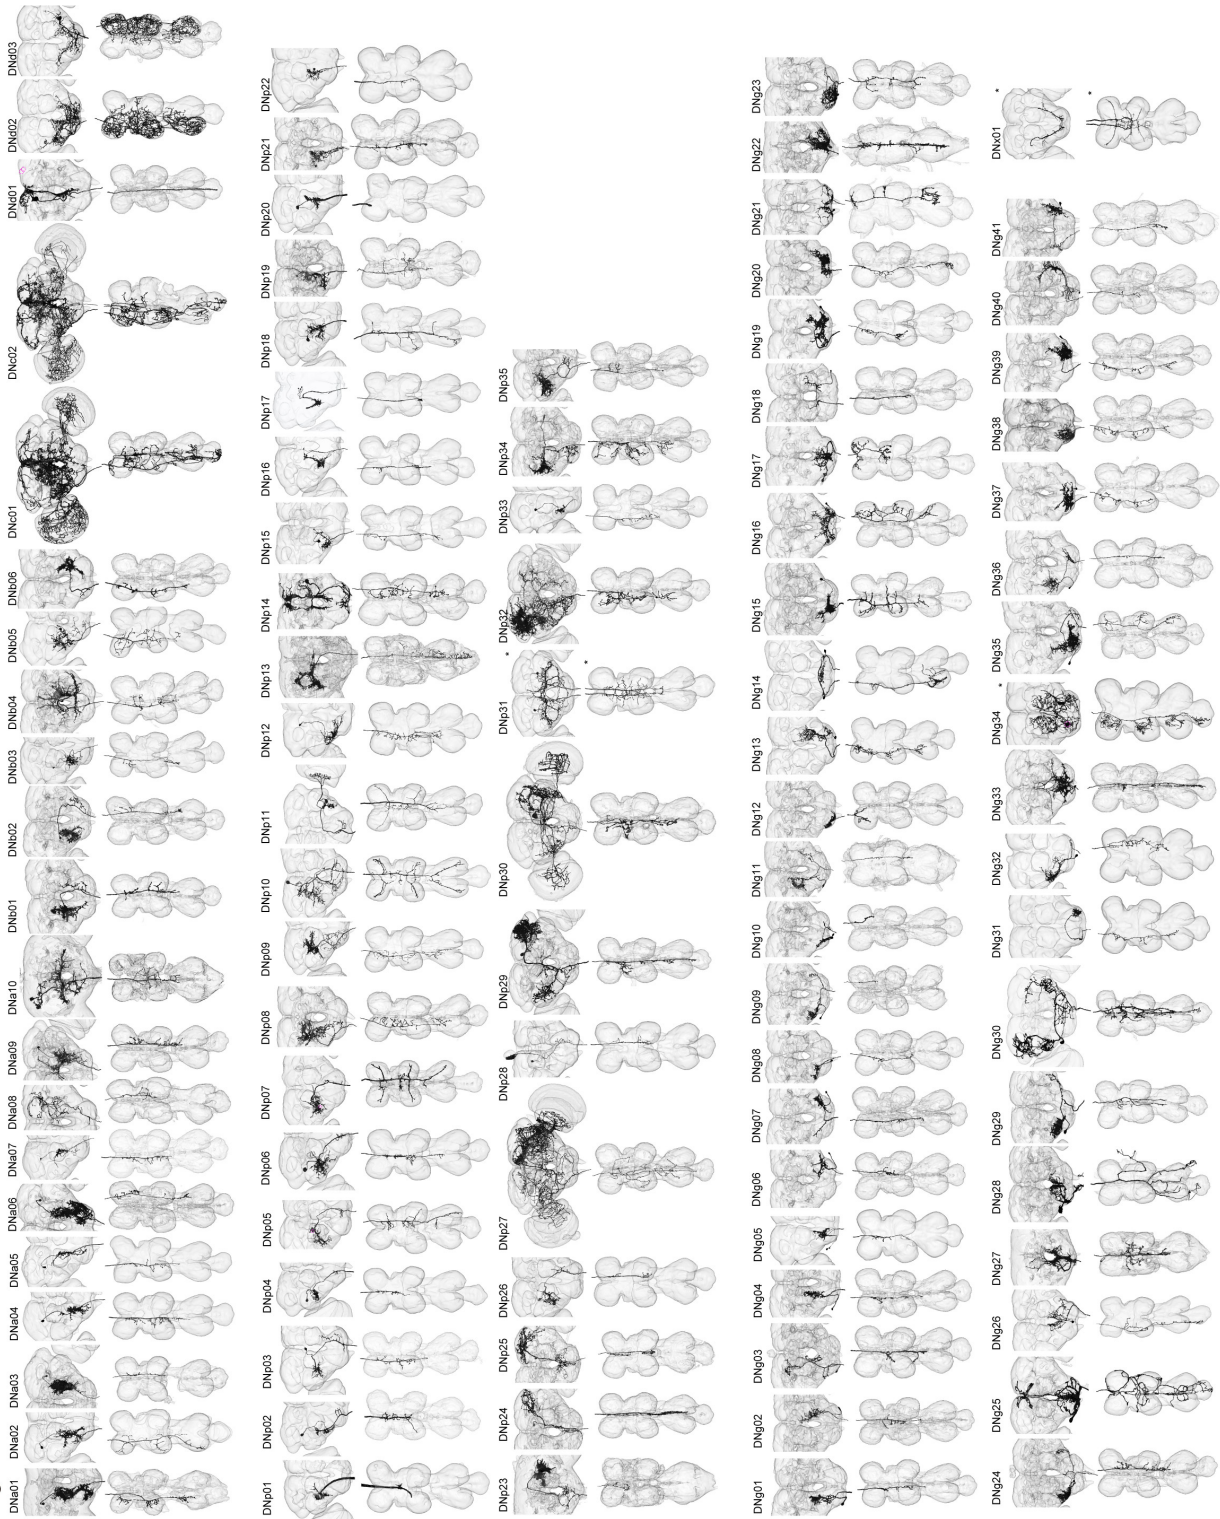

1309

1310 **Figure 2. Reconstruction of identified descending neurons.**

1311 Morphology of descending neurons identified in the present study. Neurons (black) and neuropil regions  
1312 of the brain and VNC are shown (transparent). A total of 98 different cell types are shown. Neurons on  
1313 both sides of the brain are shown in some cases (asterisk). Segmentation of neuron volume were  
1314 performed using GAL4 lines with sparse expression and reconstructed with volume rendering. Figure 2—  
1315 figure supplement 1-4 show confocal images masked for individual neurons.

Figure 3

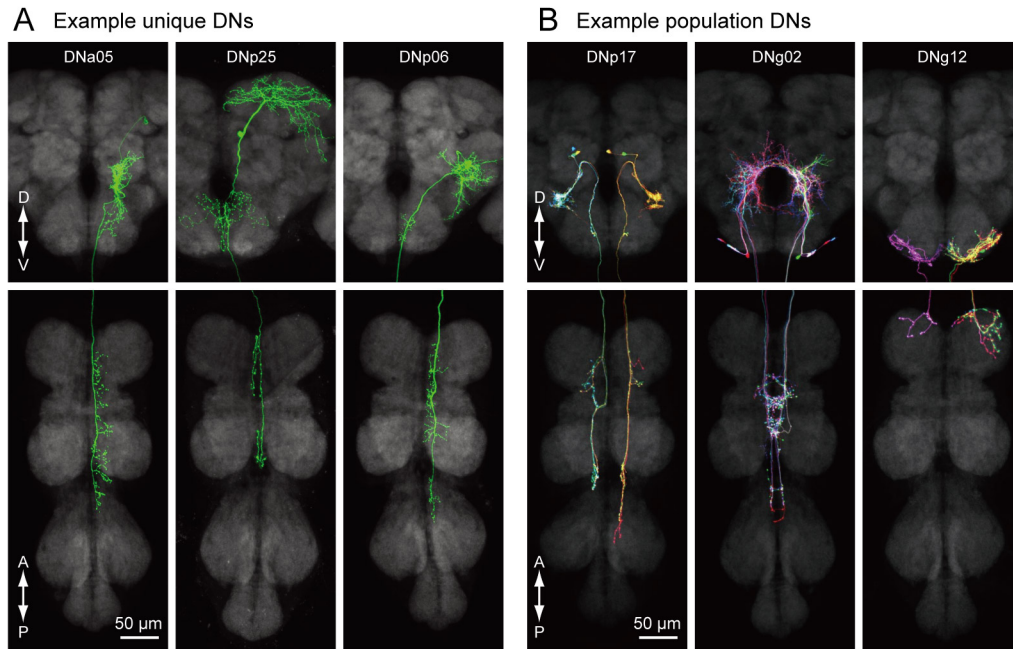

1316

1317

1318 **Figure 3. Unique and population descending neurons.**

1319 **(A)** Three example morphologies of DNs that are uniquely identifiable (DNa05, DNp25 and DNp06).

1320 Maximum intensity projection images for brain (top) and VNC (bottom) are shown.

1321 **(B)** Three examples of of population DNs, with individual neurons revealed by multicolor flip-out

1322 (DNp17, DNg02 and DNg12). Each neuron of the same DN type shows similar morphology and we do

1323 not discriminate individual DNs for these population types.

Figure 4

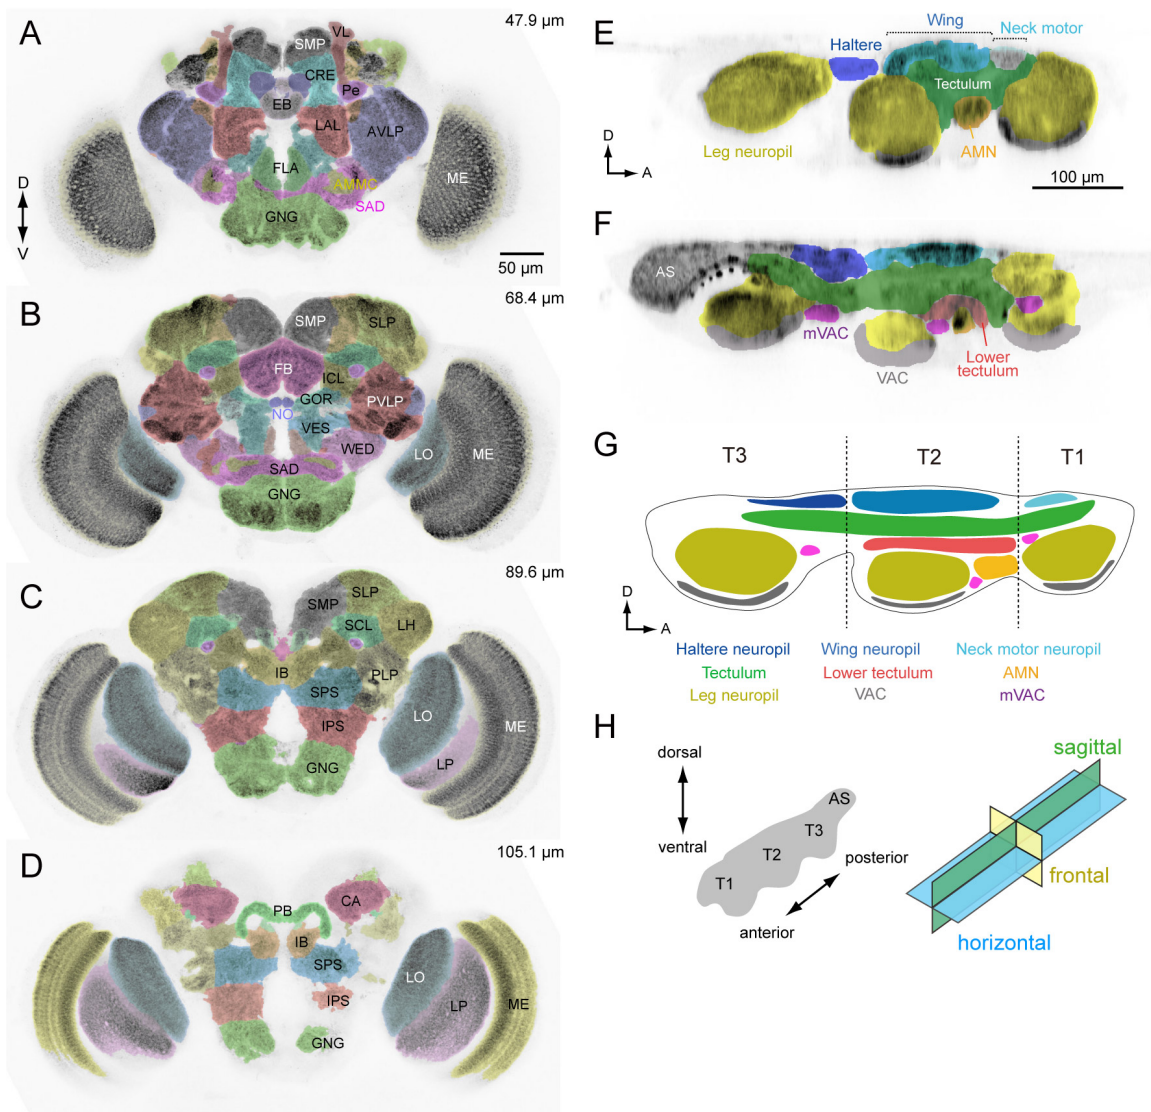

1324

1325

**Figure 4. Anatomical compartments of the brain and VNC in *Drosophila*.**

1326 (A-D) Identified brain neuropils labeled with different colors superimposed on an aligned confocal image.

1327 Depth from the anterior surface is indicated in *top-right* of each image. The data is from Virtual Fly

1328 Brain, <http://www.virtualflybrain.org/>. Neuropil names are from Ito et al., 2014 and name abbreviations

1329 are summarized in Supplementary Table 6.

1330 (E, F) Sagittal view of VNC confocal images through a lateral (E) and medial (F) plane. The colors

1331 represent our divisions of the recognized domains in the VNC: AMN (accessory mesothoracic neuropil),

1332 AS (abdominal segment), mVAC (medial ventral association center), VAC (ventral association center).

1333 (G) Schematic of the neuropils in the VNC. T1 (prothoracic segment), T2 (mesothoracic segment), T3

1334 (metathoracic segment).

1335 (H) The axis and sections used to describe VNC anatomy. The body axis is used.

Figure 5

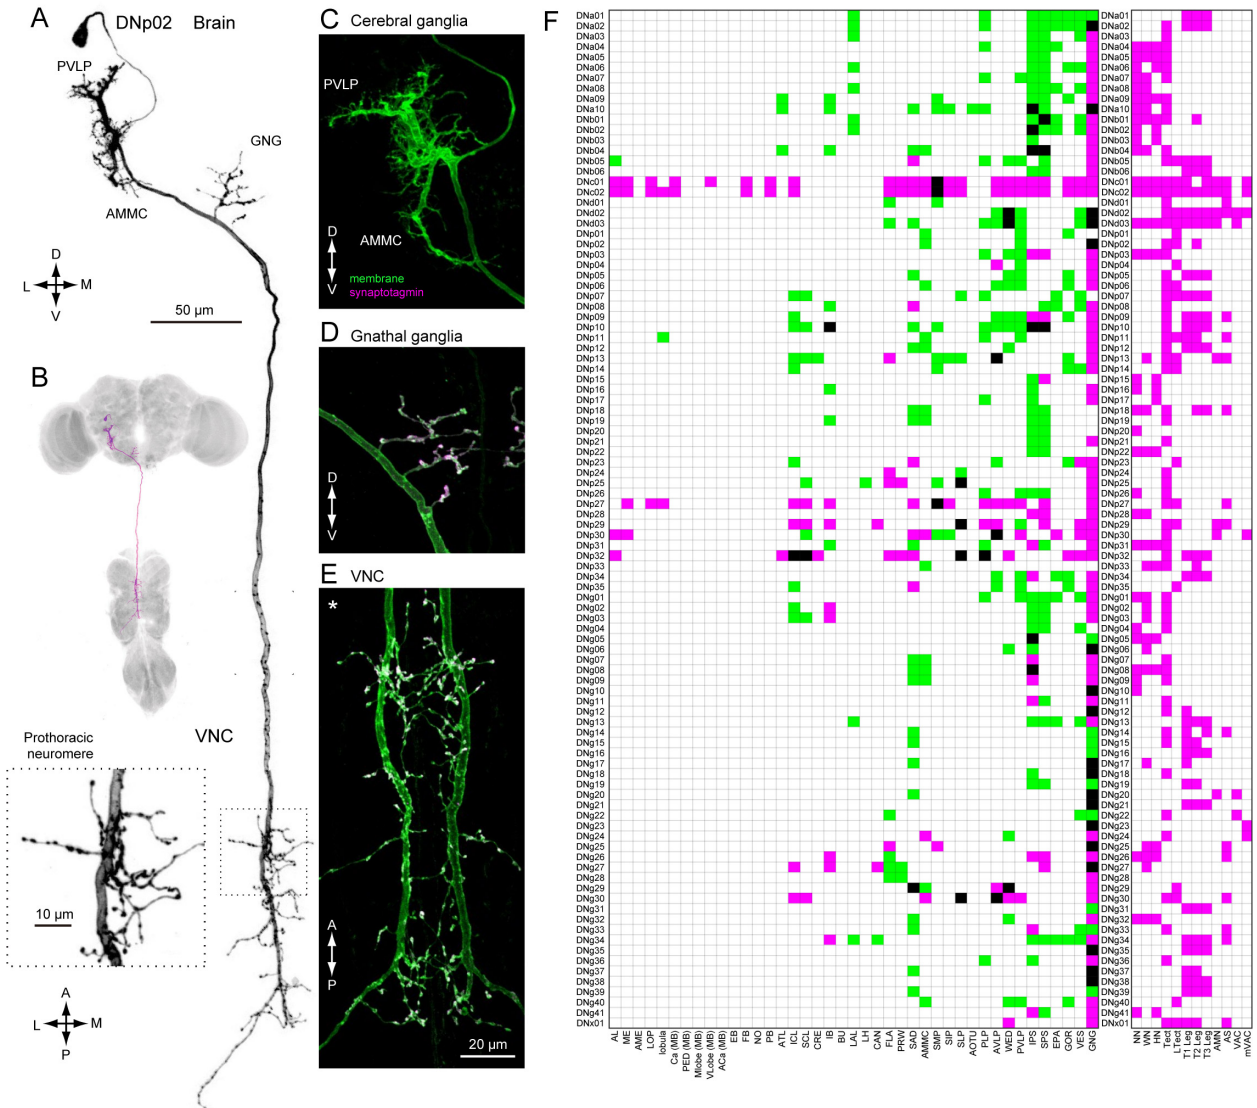

1336



1337 **Figure 5. Distinguishing DN inputs and outputs.**

1338 **(A)** The morphology of DNp02. The DN neurites have a smooth appearance in the posterior ventral  
1339 lateral protocerebrum (PVLP) and anterior mechanosensory motor center (AMMC), and varicose  
1340 processes in the gnathal ganglia (GNG) and the VNC. Inset shows a magnified view of the DN  
1341 innervation in the VNC prothoracic ganglia, which show the varicose appearance.

1342 **(B)** The morphology of DNp02 with nc82 counter-staining.

1343 **(C-E)** Determining polarity of DNp02 by cell-specific co-expression of a membrane-bound GFP (green)  
1344 and the presynaptic reporter synaptotagmin-smGFP-HA (magenta). Co-expression (white) is observed in  
1345 the GNG and VNC, but not in the cerebral ganglion, indicating the DN is post-synaptic in the brain and  
1346 pre-synaptic in the GNG and VNC.

1347 **(F)** Innervation profile of DNs in the brain and VNC. In each row, a filled pixel indicates the presence of  
1348 innervation by the corresponding DN in the corresponding CNS neuropil column. Green indicates  
1349 innervation by smooth process, magenta indicates innervation by varicose processes, and black indicates  
1350 the region receives both types of processes. Smooth and varicose process of DNs are intermingle in the  
1351 brain. The innervation in the gnathal ganglia (GNG) is mostly by varicose processes. Innervation into the  
1352 VNC shows varicose endings in all cases.

Figure 6

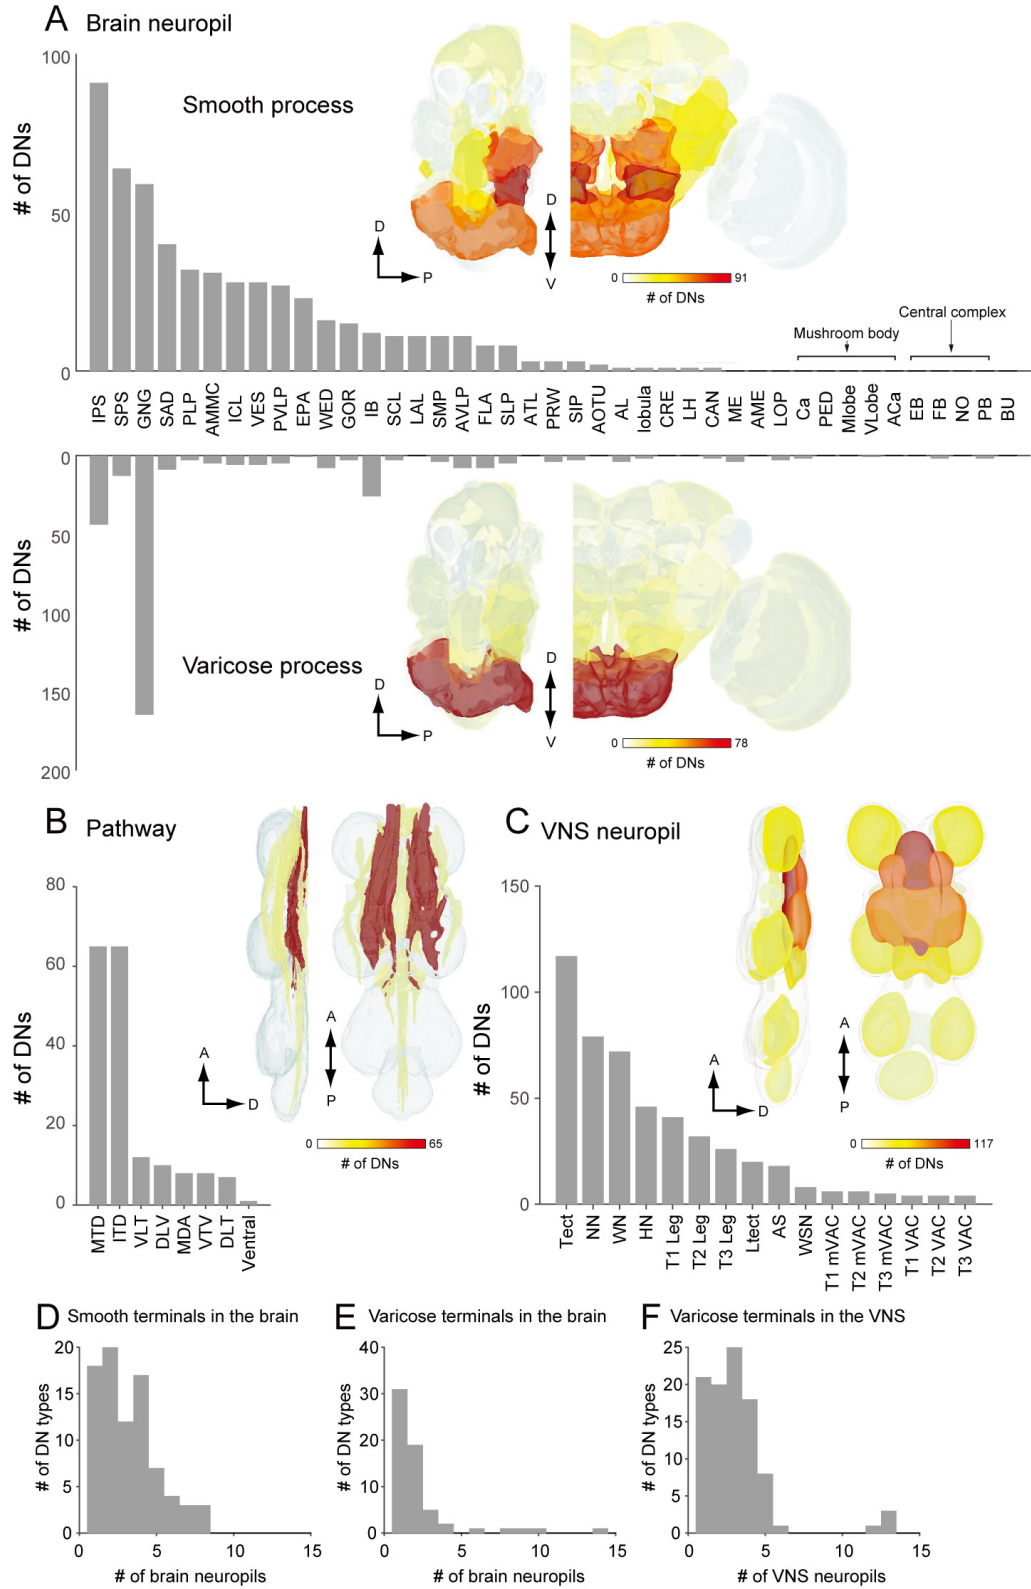

1354 **Figure 6. The number of identified DNs and their neurite distribution.**

1355 **(A)** The number of DNs innervating individual brain regions with smooth process (top) and varicose  
1356 process (bottom). The inset is a heat map of DN innervation in the brain: sagittal and frontal views show  
1357 brain neuropils in which the number of DNs with processes in each compartment are represented with  
1358 pseudo-color. Polarity was determined based on their terminal morphology, confirmed by synaptotamin  
1359 expression in 55 cell types (see Figure 5). Compartments of the caudal part of the brain, including  
1360 superior and inferior posterior slope (SPS, IPS) and GNG, contain smooth processes from the largest  
1361 number of DNs. The GNG contains varicose processes from the largest number of DNs. The IPS and  
1362 inferior bridge (IB) also contain varicose process of many DNs.

1363 **(B)** The distribution of DNs running through different descending tracts. Inset shows the heat map. The  
1364 majority of DNs run through either the median tract of dorsal cervical fasciculus (MTD) or intermediate  
1365 tract of dorsal cervical fasciculus (ITD). The segmented image is modified from Boerner et al., 2010.  
1366 Anatomical detail including the position and name for individual tracts are shown in Figure 3—figure  
1367 supplement 1.

1368 **(C)** The distribution of DNs innervating individual VNC regions with varicose process. Inset shows the  
1369 heat map. The number of DNs is more higher for the dorsal side than ventral side in the VNC. The  
1370 tectulum receive the largest descending input.

1371 **(D-F)** A histogram of the number of brain (D-E) and VNC (F) regions innervated by different DN types.  
1372 Note that panels A-C quantify DN neurons individually, including the number of DNs in a given  
1373 population type, whereas D-F count DN types, not individual neurons.

Figure 7

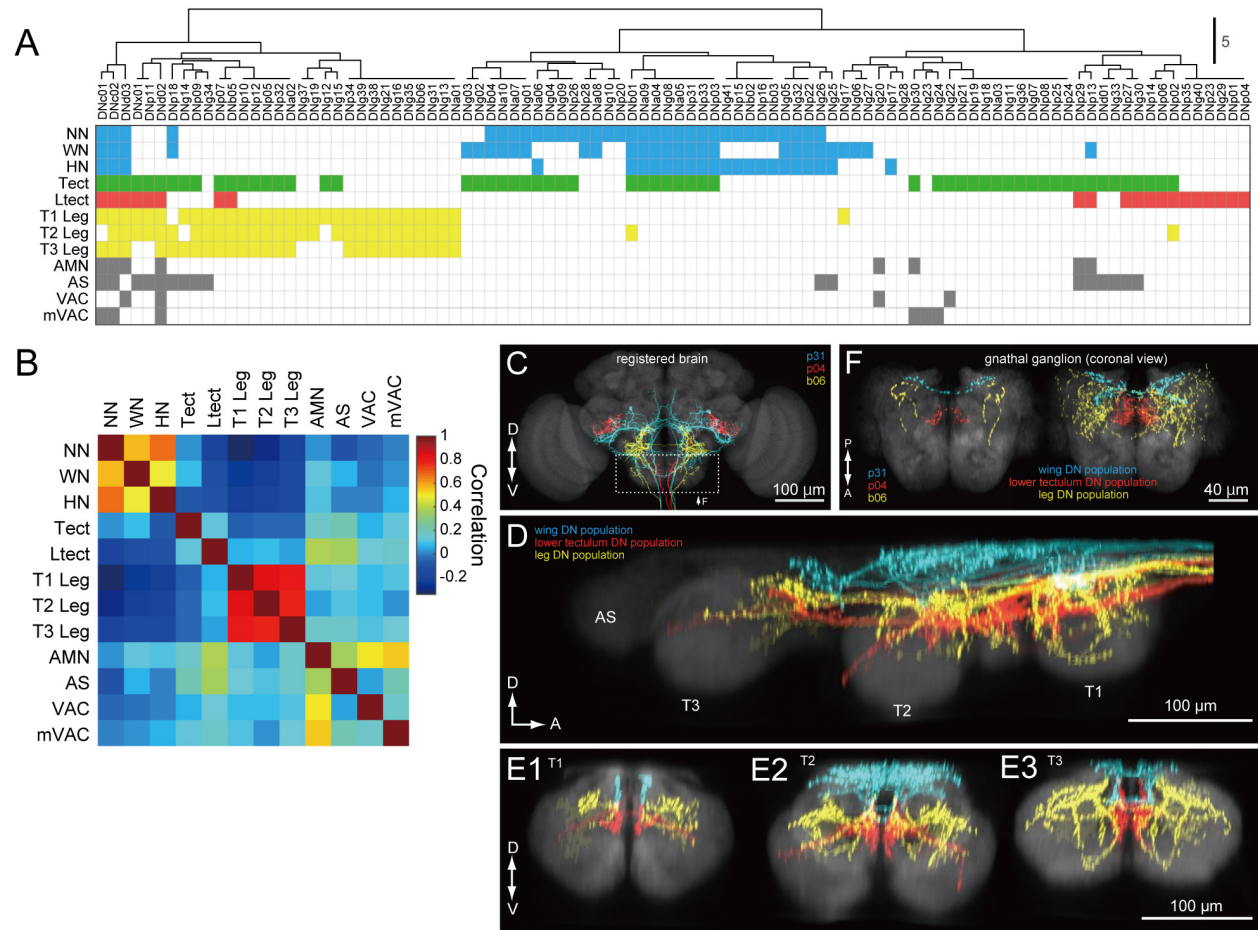

1374

1375 **Figure 7. DNs differentially address wing/neck/haltere and leg motor systems.**

1376 **(A)** Clustering of VNC neuropils based on patterns of innervation by each DN. We observed varicose  
1377 processes in the neuropil represented by the corresponding row for the DN in the corresponding column.

1378 Pixel color indicates VNC compartment grouping: Dorsal neuropils (blue), tectulum (green), lower  
1379 tectulum (red), leg neuropils (yellow), or other regions (AMN, AS, VAC, mVAC; gray).

1380 **(B)** Autocorrelation matrix of innervation pattern in the VNC. For each pair of VNC compartments, the  
1381 Pearson's correlation coefficient between DN innervation profiles was calculated. The strongest

1382 correlation was amongst compartments within the same grouping (see colors above) but in different  
1383 segments.

1384 **(C-F)** Examination of DN varicose processes in the brain gnathal ganglia. **(C)** Three example DNs from  
1385 different split-GAL4 lines aligned to a standard brain template and overlaid. Neurons are colored

1386 according to which VNC compartments they innervate (wing neuropil, blue; leg neuropils, yellow; lower  
1387 tectulum, red). **(D)** Sagittal view of axonal projectons within the VNC of a subset of the DN population.

1388 **(E)** Transverse view of DN terminals in the different VNC segments: metathoracic (E1), mesothoracic

1389 (E2) and prothoracic (E3). **(F)** Horizontal view of DN innervation in the GNG. Magnified view of dashed

1390 box in C, shows images of the three example DNs (*left*). A group of 15 DNs for which aligned VNC data  
1391 were available are also shown in the same view (*right*). The varicose processes of DNs targeting the

1392 same compartments in the VNC also form separate clusters in the GNG.

Figure 8

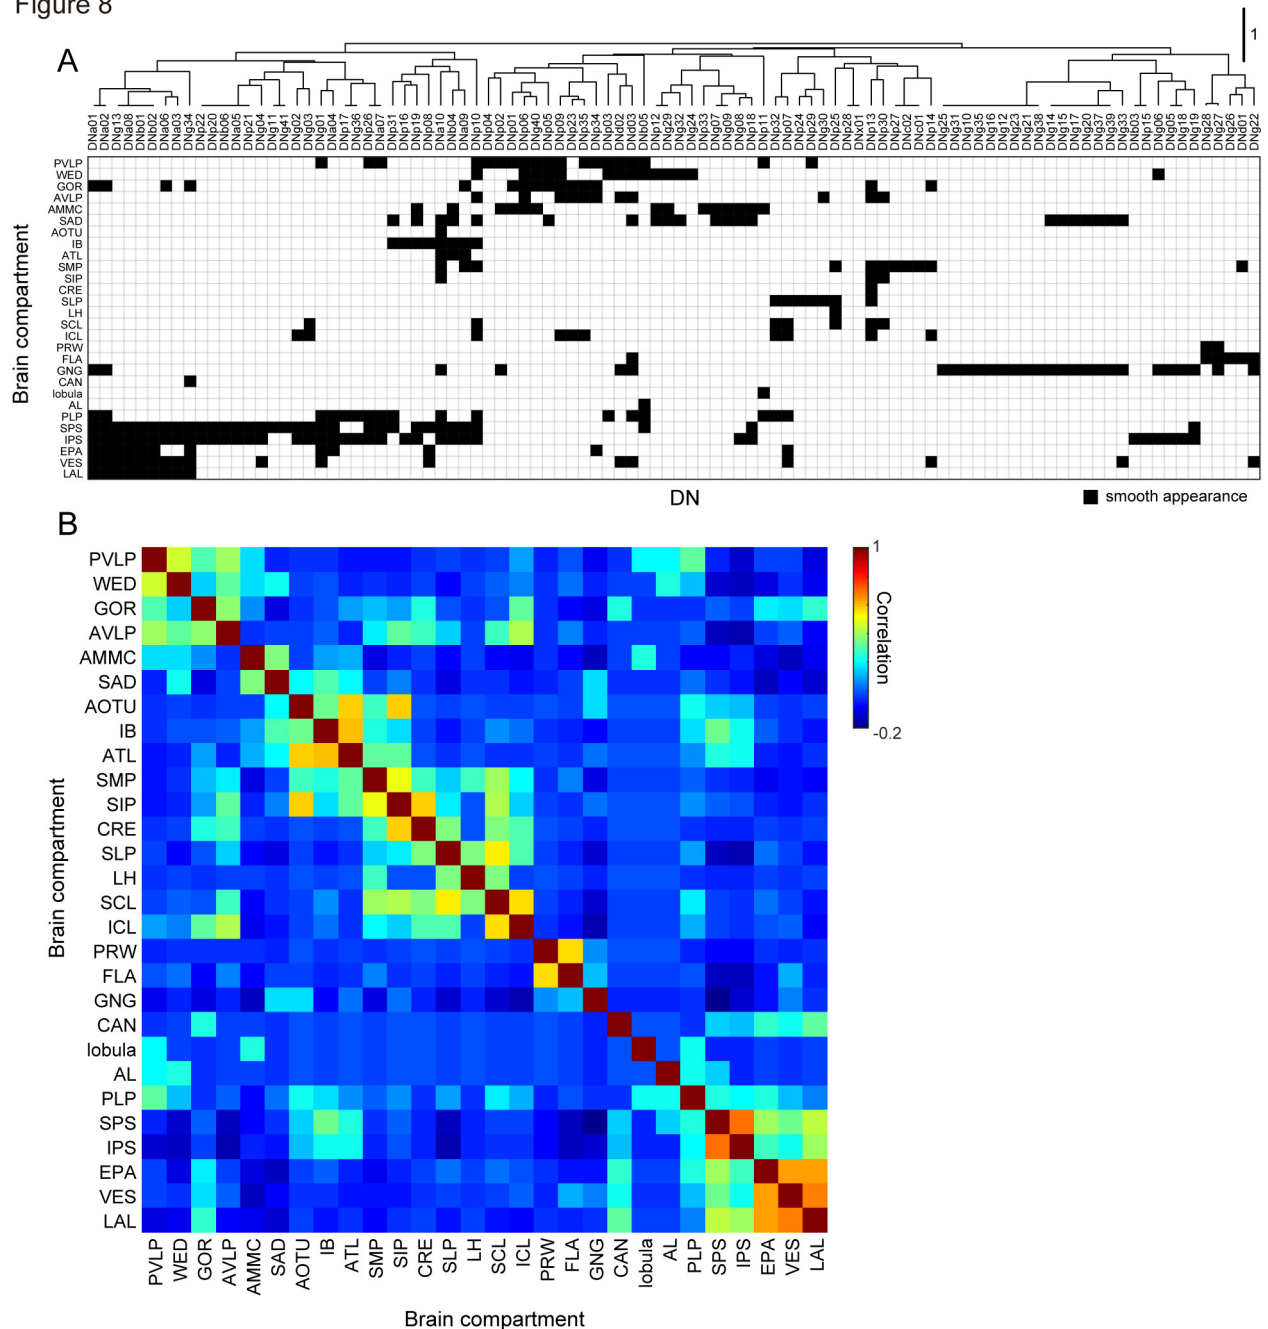

1393

1394 **Figure 8. Brain innervation by DNs.**

1395 **(A)** Clustering of brain neuropils based on patterns of DN innervation. Both brain neuropils (rows) and  
 1396 DNs (columns) were sorted by hierarchical clustering based on Pearson's correlation as a metric and  
 1397 average linkage for calculating distances. Only brain compartments with DN innervation are shown.

1398 **(B)** Autocorrelation matrix shows the similarity of DN innervation pattern among brain regions. For each  
 1399 pair of brain compartments, the Pearson's correlation coefficient between DN innervation profiles was  
 1400 calculated.

Figure 9

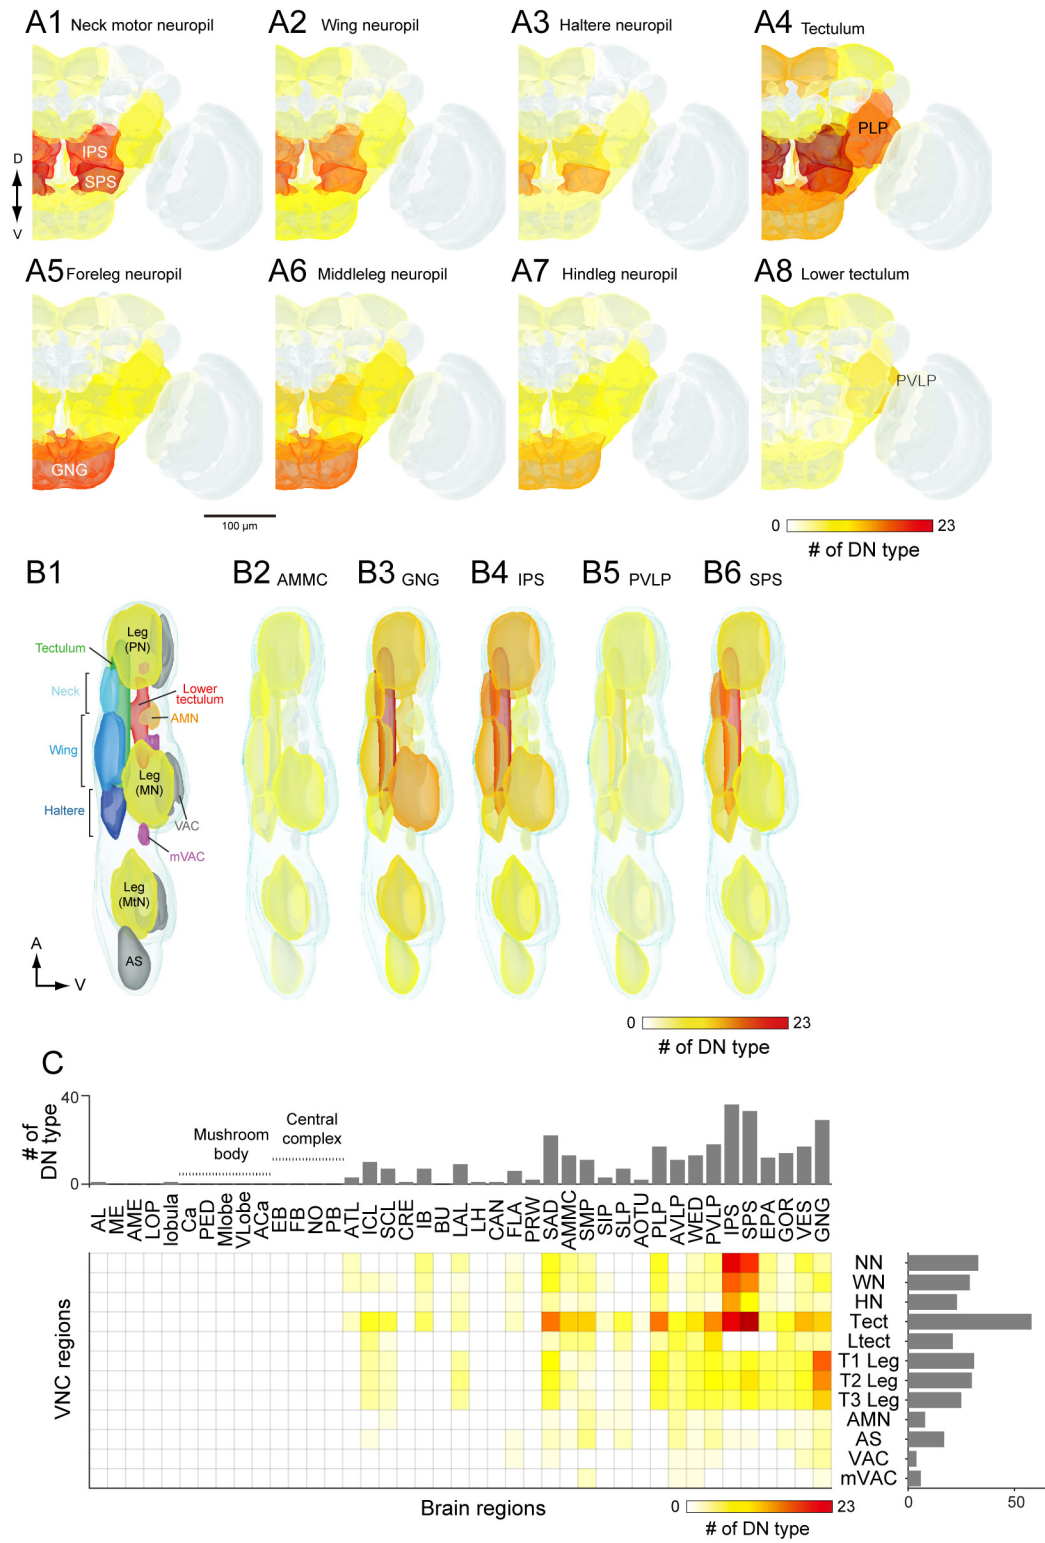

1401

1402 **Figure 9. DN connectivity between the brain and VNC.**

1403 **(A)** Dendritic distribution of DNs grouped by output. Heat map colors indicate the number of DN types  
1404 innervating each brain neuropil for different groups of DNs (A1-A8) defined by their projection to a  
1405 specified VNC neuropil. The brain innervation pattern is similar among DN groups projecting to the  
1406 different dorsal VNC neuropils (neck motor, A1; wing, A2; haltere, A3) and among DN groups projecting  
1407 to the different segmental leg neuropils (foreleg, A5; middle leg, A6; hindleg, A7). The distribution  
1408 pattern for DNs projecting to the lower tectulum is different from others, with the largest number of DNs  
1409 emanating from the posterior ventral lateral protocerebrum (PVLP).

1410 **(B)** Distribution of DN axonal projections grouped by input. Heat map colors indication the number of  
1411 DN types innervating each VNC neuropil for different groups of DNs (B2-B6) defined by their projection  
1412 from a specified a brain neuropil. The VNC atlas is shown in left panel. Innervation biased toward the leg  
1413 neuropils is observed in DNs from the GNG, toward the lower tectulum from the PVLP, and toward  
1414 dorsal neuropils from the AMMC, IPS and SPS.

1415 **(C)** The connectivity matrix shows with pseudocolor the number of DNs that innervate both a given brain  
1416 (columns) and VNC (rows) neuropil. Rich connections are observed from inferior and posterior slope  
1417 (IPS and SPS) to the dorsal neuropils and from the gnathal ganglia (GNG) to the leg neuropils. For  
1418 neuropil abbreviations, see Supplemental Table 6.



Figure 10

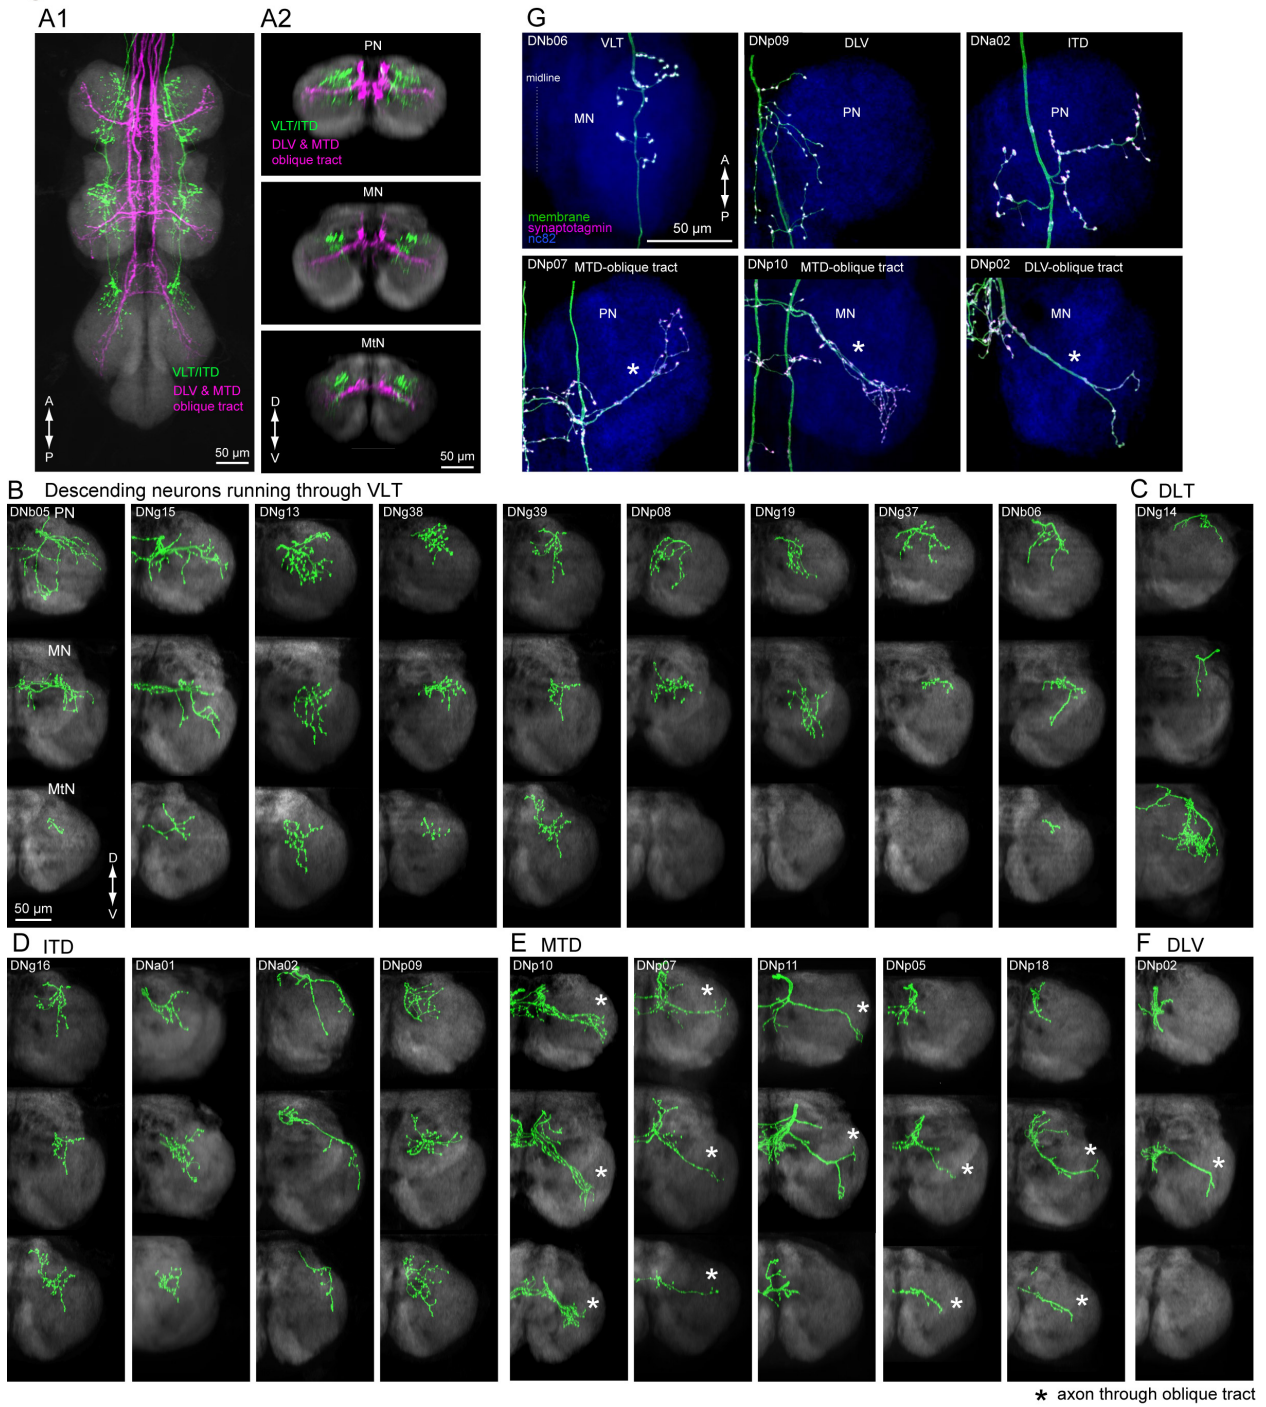

1419

1420 **Figure 10. Tract-based analysis of DN axonal projection patterns in leg neuropils**

1421 **(A)** Major DN types projecting to leg neuropils have different terminal patterns that segregate by  
1422 descending tract. Horizontal (A1) and frontal (A2) views of overlaid aligned DNs running through VLT,  
1423 ITD (green), or DLV and MTD (magenta) illustrate these two disparate patterns.

1424 **(B-F)** Individual examples of axonal projections to leg neuropil for DNs running through the (B) VLT,  
1425 (C) DLT, (D) ITD, (E) oblique via MTD, or (F) oblique via DLV tracts. Transverse sections of the  
1426 prothoracic (*top*), mesothoracic (*middle*) and metathoracic (*bottom*) neuromere are shown. In most cases,  
1427 the termination zone of axons were similar among the different segments and for DNs within the same  
1428 tract. DNs do not innervate the hindleg neuropil in some cases. Note DN<sub>g14</sub> was the only DN identified  
1429 in this study that traverses the DLT tract.

1430 **(G)** Examples of neuronal polarity of DN axonal projection in leg neuropils. The synaptotagmin signal  
1431 (magenta) was observed in terminals all along the oblique tract (*bottom row*).

Figure 11

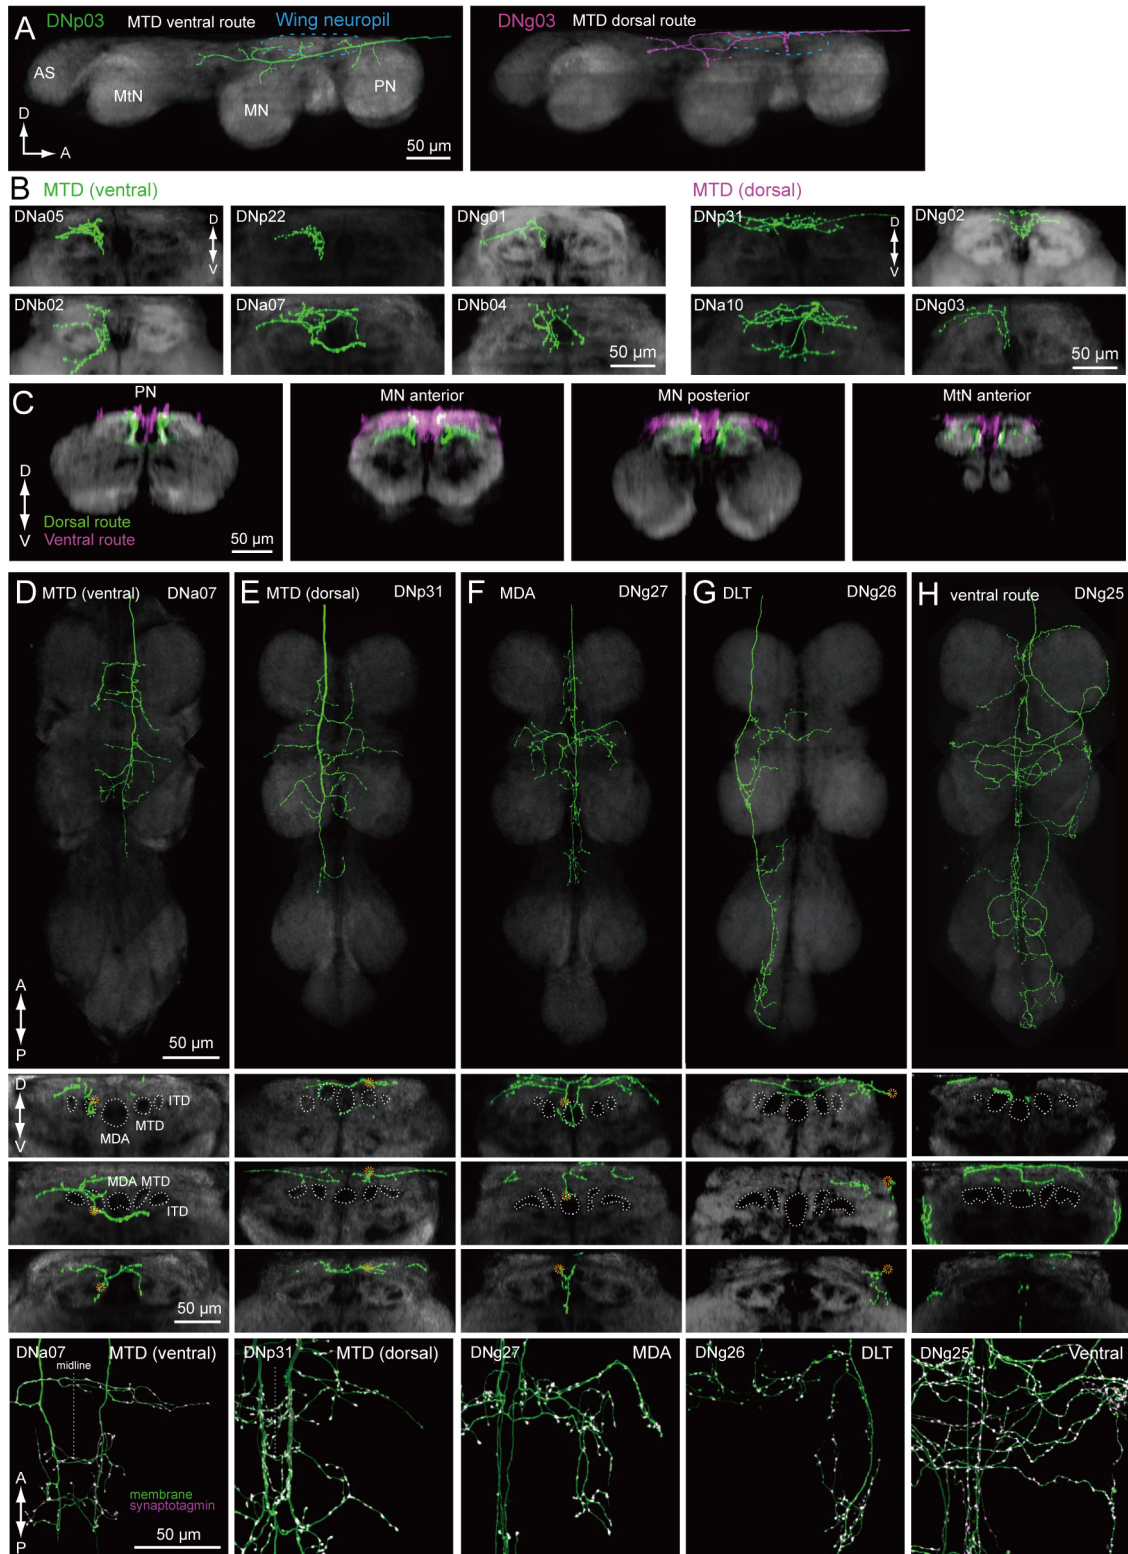

1432

1433 **Figure 11. Tract-based analysis of DN axonal projection patterns in the wing neuropil.**

1434 **(A)** Sagittal view of two example DN types targeting wing neuropil (blue dashed line) via the MTD tract.  
1435 The axon of DNp03 (green) travels ventrally, with the volume of its major axon in the MTD. In contrast,  
1436 DNg03 runs through the dorsal surface of the VNC from T1 to the middle of T2 segments, and enters the  
1437 MTD tract in T2 (magenta).

1438 **(B-C)** Frontal view of more example axonal projections (B) for DNs running through the ventral route  
1439 (*left*) and dorsal route of the MTD (*right*). Merged images of DNs running through ventral and dorsal  
1440 MTD route (C) shown for a middle section of the prothoracic neuropil, anterior and posterior sections of  
1441 the mesothoracic neuropil, and an anterior section of the metathoracic neuropil illustrate how the two  
1442 groups target different sublayers in the wing neuropil.

1443 **(D-H)** Individual examples of DN axonal projections in the wing neuropil for DNs running through the  
1444 (D) MTD ventral, (E) MTD dorsal, (F) MDA, (G) DLT, and (H) ventral route tracts. Shown are a  
1445 horizontal view of the whole VNC (*top*), and frontal sections of the prothoracic (*2nd panel*), mesothoracic  
1446 (*3rd*) and metathoracic neuromeres (*4th*). Synaptotagmin labeling is shown at the bottom for the bilateral  
1447 pair. Note DNg27 in the only DN identified in this study which runs through the MDA.

Figure 12

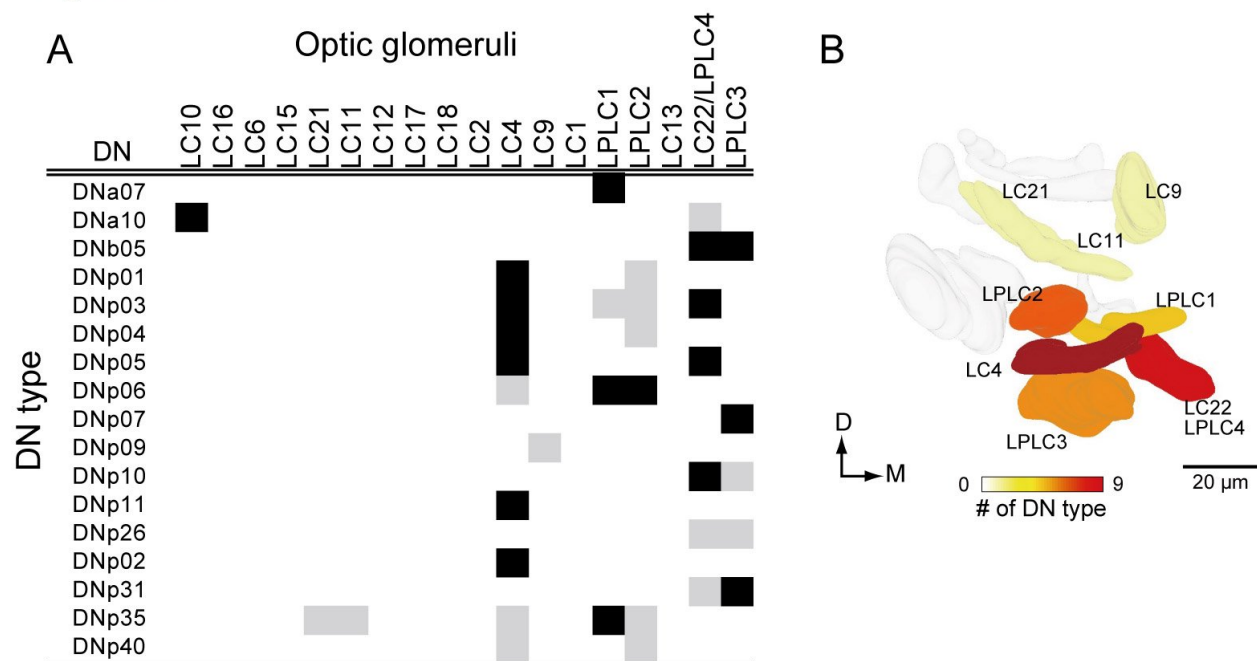

1448

1449

1450 **Figure 12. DNs from optic glomeruli.**

1451 **(A)** A matrix indicating DN innervation in the optic glomeruli. Neurite innervation in individual  
 1452 glomeruli was observed with a 63x objective. Black and gray pixel shading represent dense and sparse  
 1453 innervation, respectively. Many DNs were identified that innervate the LC4, and LC22/LPLC4 glomeruli.  
 1454 No DNs were identified that innervated about a half of the glomeruli.

1455 **(B)** The number of DNs innervating individual glomeruli shown as pseudo-color onto the 3D-atlas of  
 1456 optic glomeruli. More DNs were found innervating the more posterior-ventral glomeruli

Figure 13

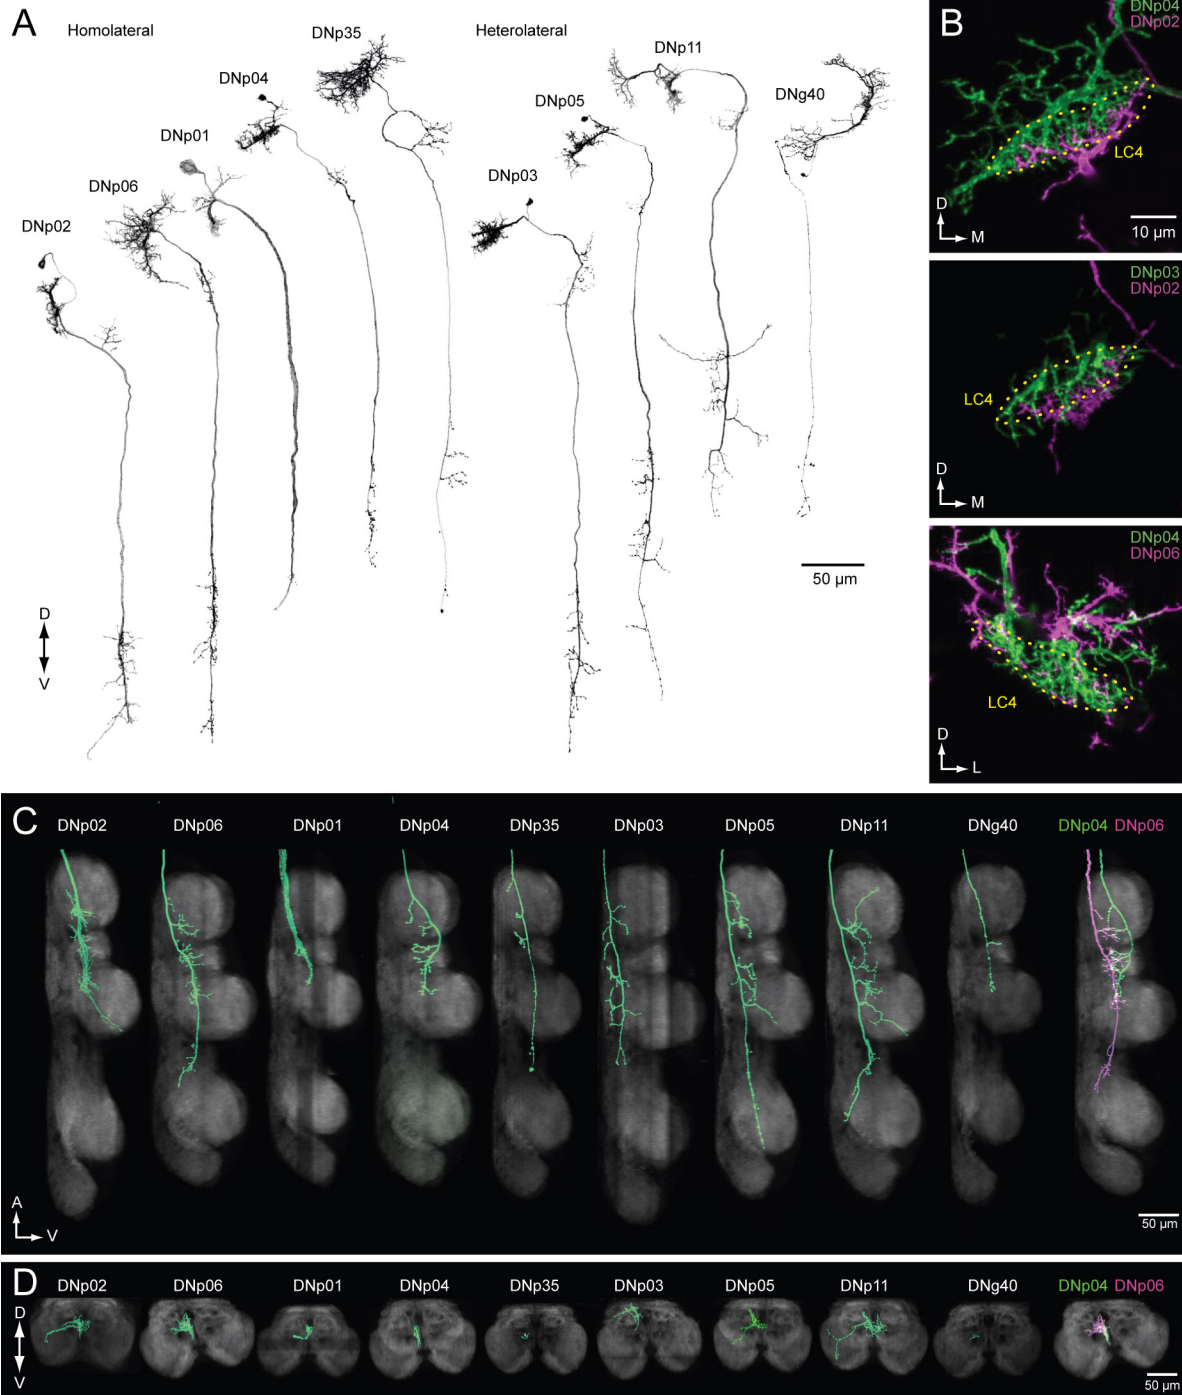

1457

1458 **Figure 13. DNs forming a dendritic cluster within the LC4 glomerulus project to the lower**  
1459 **tectulum.**

1460 **(A)** The morphologies of DNs which have dendritic innervation to the LC4 glomerulus ('LC4 DNs'). The  
1461 maximum intensity projection of a confocal stack with 20x objective are shown. All DNs partially share  
1462 input (LC4 glomeruli) and most of them have axonal projection into the lower tectulum. These DNs are  
1463 comparable to the "descending neuron cluster" reported in blowflies (Miled & Strausfeld, 1984).

1464 **(B)** Simultaneous labeling of two different DNs innervating the LC4 glomerulus, visualized using  
1465 multicolor flip out (see Methods). Three examples are shown. The shape of the LC4 glomerulus is shown  
1466 with dotted line.

1467 **(C)** Sagittal view of LC4 DN axonal projections within the VNC. All but one (8/9) have axon terminals  
1468 in the lower tectulum region of the VNC. One DN does not innervate this region (DNp03). An example  
1469 of simultaneous labeling of 2 DNs is shown (DNp04 and p06, *right*).

1470 **(D)** Frontal view of LC4 DN projections in the mesothoracic neuropil. Projections are focused in the  
1471 central region of the VNC volume, in the lower tectulum layer.

Figure 14

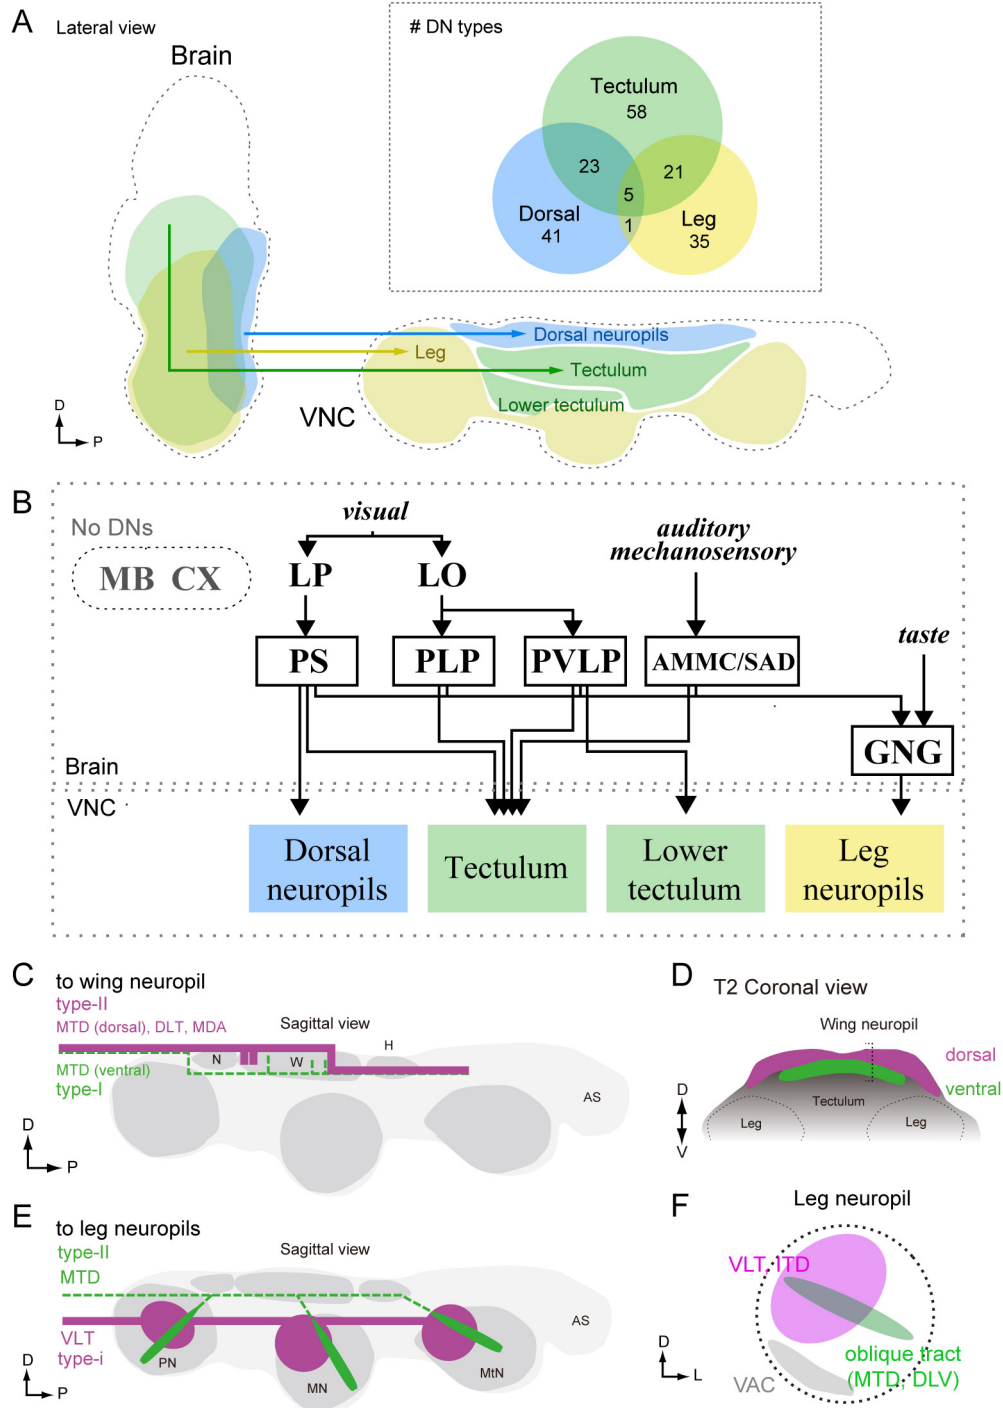

1472



1473 **Figure 14. Anatomical organization of DNs in *Drosophila*.**

1474 **(A)** Sagittal view schematic of brain and VNC illustrating the major descending pathways. Gross  
1475 innervation areas of different DN types are shown with color. Inset shows number of each DN type  
1476 targeting the three main VNC layers.

1477 **(B)** The wiring diagram between the brain and VNC via DNs. Only the major connections are shown.

1478 **(C-D)** Schematic of DN axonal projection into wing neuropil shown in sagittal (C) and frontal (D) views.  
1479 DN populations that supply axons from the dorsal surface (*type-II*) provide more terminals than those  
1480 contained within the more ventral MTD tract (*type-I*). See also Figure 11. Type-I DNs are more likely to  
1481 project to the dorsal zone, whereas the type-II DNs are more likely to project to the ventral zone of the  
1482 wing neuropil.

1483 **(E-F)** Schematic showing two types of DN innervation patterns in leg neuropils for the whole VNC (E)  
1484 and a single leg neuropil (F). The majority of DNs send projection to the medio-dorsal area of leg  
1485 neuropil (magenta), whereas DNs running through oblique tract via MTD or DLV have fewer terminals  
1486 and extend to the ventral part of the leg neuropil (green). In most cases, DNs do not innervate the ventral  
1487 association center (VAC), the ventralmost part of the VNC, which is enriched for afferent sensory  
1488 projections (F).

Figure 15

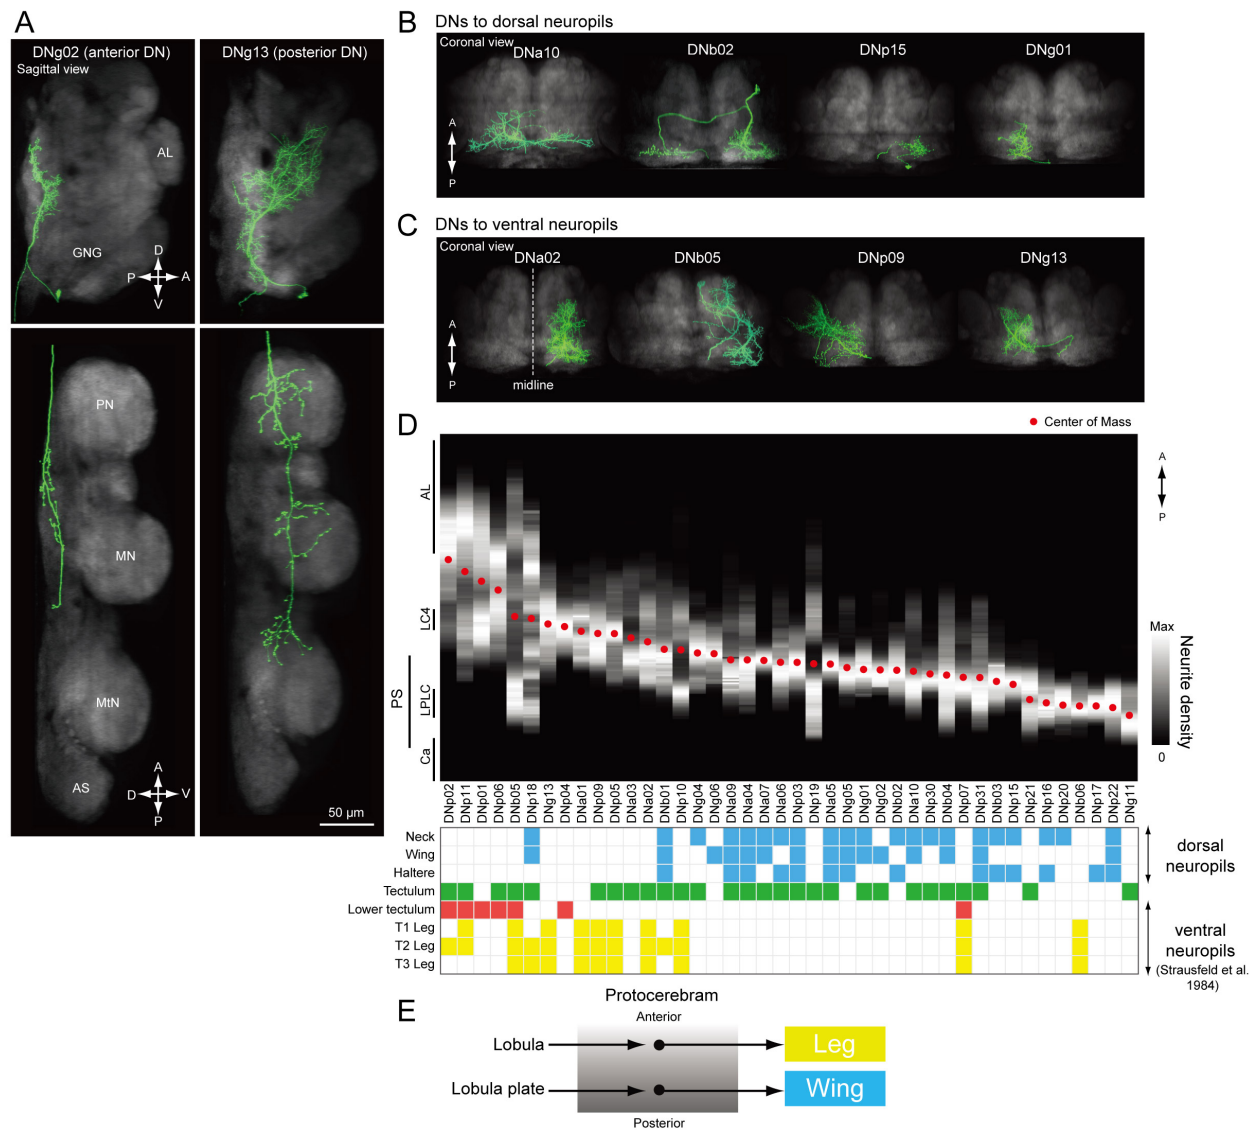

1489

1490 **Figure 15. Biased representation in the protocerebrum among DNs targeting wing and leg motor**  
1491 **areas.**

1492 **(A)** Morphology of DNs preferentially innervating anterior (DNg02, right) and posterior parts of the brain  
1493 (DNg13, left). DNg02 projects to dorsal VNC, whereas DNg13 projects to ventral VNC.

1494 **(B-C)** Frontal view of brain neurite morphology for four DNs projecting to the **(B)** dorsal or **(C)** ventral  
1495 neuropils. The dorsal-projecting DNs have neurites limited to the posterior side of the brain, whereas the  
1496 neurites of ventral-projecting DNs extend to the anterior side of the brain.

1497 **(D)** Neurite distribution of the DNs. The relative density of neurites for each DN are shown in gray scale  
1498 along the anterior-posterior axis based on aligning the data in the registered brain. The red circle indicates  
1499 the center of mass of the neurite distribution. Along the x-axis, the DNs are arranged in by center of mass  
1500 position from anterior to posterior. Neurite density was normalized by the maximum value for individual  
1501 neurons. Table below shows DN projection neuropils in the VNC (blue, dorsal neuropils; yellow, leg  
1502 neuropils). DNs with innervation towards the ventral side are more likely to project to leg neuropils.

1503 **(E)** Schematic of hypothesized information flow in visual descending pathways. The DN dendritic  
1504 regions in the protocerebrum are not separated, rather there may be a gradient in the preference for axonal  
1505 projection.
